# Supplementary material for: QSAR, Molecular Docking, MD Simulation and MMGBSA Calculations Approaches to Recognize Concealed Pharmacophoric Features Requisite for the Optimization of ALK Tyrosine Kinase Inhibitors as Anticancer Leads
Source: MDPI journal article supplement (doi:10.3390/molecules27154951), 2022-08-03
Supplement: s1 [file s1]

Description of the performance parameters in QSARINS

| Performance parameter | Calculated during             | Formula                                                                                                                 | Description                                                                                                                                                  |
|-----------------------|-------------------------------|-------------------------------------------------------------------------------------------------------------------------|--------------------------------------------------------------------------------------------------------------------------------------------------------------|
| $R^2, R^2_{ext}$      | training, external validation | $R^2 = 1 - \frac{\sum_{i=1}^n (y_i - \hat{y}_i)^2}{\sum_{i=1}^n (y_i - \bar{y})^2} = 1 - \frac{RSS}{TSS}$               | Explained variance; coefficient of determination, square of the multiple correlation coefficient                                                             |
| $R^2_{adj.}$          | training                      | $R^2_{adj.} = R^2 - (1 - R^2) \times \frac{p}{n - p - 1}$                                                               | $R^2$ corrected with the degree of freedom                                                                                                                   |
| $R^2 - R^2_{adj.}$    | training                      | see above                                                                                                               | Difference of the two                                                                                                                                        |
| LOF                   | training                      | $LOF = \frac{RSS}{M + d(M - 1)/2}$ $\frac{\mathbf{I}^T (\mathbf{I} - \frac{\mathbf{I} \mathbf{I}^T}{n}) \mathbf{h}}{n}$ | Friedman lack of fit criteria [40]. M: total number of linearly independent bases in the model, d: degrees-of-freedom cost for each nonlinear basis function |
| $K_x$                 | training                      | Based on PCA, see [41] for details                                                                                      | Inter-correlation among descriptors                                                                                                                          |

|            |                                   |                                                                                                                                                                    |                                                                           |
|------------|-----------------------------------|--------------------------------------------------------------------------------------------------------------------------------------------------------------------|---------------------------------------------------------------------------|
| $\Delta K$ | training                          | Based on PCA, see [41] for details                                                                                                                                 | Difference of correlation among descriptors ( $K_x$ ) and the             |
|            |                                   |                                                                                                                                                                    | descriptors plus responses ( $K_{xy}$ )                                   |
| $RMSE$     | training, int.<br>val., ext. val. | $RMSE = \sqrt{\frac{\sum_{i=1}^n (y_i - \hat{y}_i)^2}{n}}$                                                                                                         | Root mean square error                                                    |
| $MAE$      | training, int.<br>val., ext. val. | $MAE = \frac{\sum_{i=1}^n  y_i - \hat{y}_i }{n}$                                                                                                                   | Mean absolute error                                                       |
| $RSS$      | training                          | $RSS = \sum_{i=1}^n (y_i - \hat{y}_i)^2$                                                                                                                           | Residual sum of squares                                                   |
| $CCC$      | training, int.<br>val., ext. val. | $CCC = \frac{2 \sum_{i=1}^n (y_i - \bar{y})(\hat{y}_i - \hat{y})}{\sum_{i=1}^n (y_i - \bar{y})^2 + \sum_{i=1}^n (\hat{y}_i - \hat{y})^2 + n(\bar{y} - \hat{y})^2}$ | Coefficient of concordance, concordance<br>correlationcoefficient [42,43] |
| $s$        | training                          | $s = \sqrt{\frac{1}{N-1} \sum_{i=1}^N (y_i - \hat{y}_i)^2}$                                                                                                        | Standard error of the estimate                                            |

|     |          |                                                                                                           |              |
|-----|----------|-----------------------------------------------------------------------------------------------------------|--------------|
| $F$ | training | $F = \frac{\sum_{i=1}^N (\bar{y} - \hat{y}_i)^2}{p - 1} / \frac{\sum_{i=1}^N (y_i - \hat{y}_i)^2}{n - p}$ | Fisher value |
|-----|----------|-----------------------------------------------------------------------------------------------------------|--------------|

|                    |                                     |                                                                                                                       |                                                                                                     |
|--------------------|-------------------------------------|-----------------------------------------------------------------------------------------------------------------------|-----------------------------------------------------------------------------------------------------|
| $Q^2_{LOO}$        | internal<br>validation              | $Q^2_{LOO} = 1 - \frac{\sum_{i=1}^n (y_i - \hat{y}_{i/i})^2}{\sum_{i=1}^n (y_i - \bar{y})^2} = 1 - \frac{PRESS}{TSS}$ | Leave-one-out cross-validated square of the<br>(multiple)<br><br>correlation coefficient            |
| $R^2 - Q^2_{LOO}$  | internal<br>validation              | see above                                                                                                             | Difference of the two                                                                               |
| $PRESS$            | internal,<br>external<br>validation | $PRESS = \sum_{i=1}^n (y_i - \hat{y}_{i/i})^2$                                                                        | Predicted residual sum of squares (either cross-<br>validated or calculated on the external<br>set) |
| $Q^2_{LMO}$        | internal<br>validation              | $Q^2_{LMO} = 1 - \frac{\sum_{j=1}^m \sum_{i=1}^n (y_i - \hat{y}_{i/j})^2}{\sum_{i=1}^n (y_i - \bar{y})^2}$            | Leave-many-out cross-validated square of the<br>(multiple)<br><br>correlation coefficient           |
| $R^2_{Y-SCRAMBLE}$ | internal<br>validation              | see above                                                                                                             | $R^2$ of the training set with Y-scrambling [44]                                                    |

|                          |                        |           |                                                        |
|--------------------------|------------------------|-----------|--------------------------------------------------------|
| $RMSE_{Avg, Y-SCRAMBLE}$ | internal<br>validation | see above | Average RMSE with Y-scrambling [44]                    |
| $Q^2_{Y-SCRAMBLE}$       | internal<br>validation | see above | $Q^2_{LOO}$ of the training set with Y-scrambling [44] |

|                   |                        |                                                                                                         |                                                                                                           |
|-------------------|------------------------|---------------------------------------------------------------------------------------------------------|-----------------------------------------------------------------------------------------------------------|
| $R^2_{RND-DESCR}$ | internal<br>validation | see above                                                                                               | $R^2$ of the training set with randomized descriptors [44]                                                |
| $Q^2_{RND-DESCR}$ | internal<br>validation | see above                                                                                               | $Q^2_{LOO}$ of the training set with randomized descriptors [44]                                          |
| $R^2_{RND-RESP}$  | internal<br>validation | see above                                                                                               | $R^2$ of the training set with randomized responses [44]                                                  |
| $Q^2_{RND-RESP}$  | internal<br>validation | see above                                                                                               | $Q^2_{LOO}$ of the training set with randomized responses [44]                                            |
| $Q^2_{F1}$        | external<br>validation | $Q^2_{F1} = 1 - \frac{\sum_{i=1}^{nEXT} (y_i - \hat{y}_i)^2}{\sum_{i=1}^{nEXT} (y_i - \bar{y}_{TR})^2}$ | Definition 1 in [35] for $Q^2$ of the external test set [40],<br>TR: training set, EXT: external test set |

|            |                        |                                                                                                                                 |                                                                                                               |
|------------|------------------------|---------------------------------------------------------------------------------------------------------------------------------|---------------------------------------------------------------------------------------------------------------|
| $Q^2_{F2}$ | external<br>validation | $Q^2_{F2} = 1 - \frac{\sum_{i=1}^{n_{EXT}} (y_i - \hat{y}_i)^2}{\sum_{i=1}^{n_{EXT}} (y_i - \bar{y}_{EXT})^2}$                  | Definition 2 in [35] for $Q^2$ of the external test set [41],<br><br>EXT: external test set                   |
| $Q^2_{F3}$ | external<br>validation | $Q^2_{F3} = 1 - \frac{\sum_{i=1}^{n_{EXT}} (y_i - \hat{y}_i)^2 / n_{EXT}}{\sum_{i=1}^{n_{TR}} (y_i - \bar{y}_{TR})^2 / n_{TR}}$ | Definition 3 in [35] for $Q^2$ of the external test set [42],<br><br>TR: training set, EXT: external test set |

|                |                        |                                    |                                                                                                                                                                                                              |
|----------------|------------------------|------------------------------------|--------------------------------------------------------------------------------------------------------------------------------------------------------------------------------------------------------------|
| $r^2_m$        | external<br>validation | $r^2_m = \frac{r^2_m + r'^2_m}{2}$ | Here, $r^2_m = R^2 \times (1 - \sqrt{R^2 - R_0^2})$ , where $R_0^2$ is the squared correlation coefficient without intercept. $r'^2_m$ is the same as $r^2_m$ , with the $x$ and $y$ axes exchanged. [43,44] |
| $\Delta r^2_m$ | external<br>validation | $\Delta r^2_m = r^2_m - r'^2_m$    | See above.                                                                                                                                                                                                   |

for *Case study 2* (c.f. figure 10)
