# Supplementary material for: QSAR, Molecular Docking, MD Simulation and MMGBSA Calculations Approaches to Recognize Concealed Pharmacophoric Features Requisite for the Optimization of ALK Tyrosine Kinase Inhibitors as Anticancer Leads
Source: Molecules. 2022 Aug 3;27(15):4951. doi: 10.3390/molecules27154951 (PMC9370430; doi:10.3390/molecules27154951)
Supplement: Supplementary file 1 [file molecules-27-04951-s001.zip]

Archive with 5 entries (5 files):
- File S5.pdf
- Table S1.xlsx
- Table S2.xlsx
- Table S3.xlsx
- Table S4.xlsx
