# Supplementary material for: QSAR, Molecular Docking, MD Simulation and MMGBSA Calculations Approaches to Recognize Concealed Pharmacophoric Features Requisite for the Optimization of ALK Tyrosine Kinase Inhibitors as Anticancer Leads
Source: Molecules. 2022 Aug 3;27(15):4951. doi: 10.3390/molecules27154951 (PMC9370430; doi:10.3390/molecules27154951)
Supplement: Supplementary file 1 [file molecules-27-04951-s001.zip › Table S1.xlsx]

## Sheet: Sheet1
Table S1: The SMILES notation for two hundred twenty four (224) ALK tyrosine kinase leads, along with their reported Ki and pKi values
CHEMBL ID	SN	pki	ki nm	Smiles
CHEMBL101311	1	6	1000	CN(C)CC(O)COc1ccc(Nc2nccc(Nc3cc(Cl)ccc3Cl)n2)cc1
CHEMBL1081312	2	6.2	630.957	Nc1ncnc2c1c(-c1cnc3[nH]ccc3c1)nn2C1CCCC1
CHEMBL1084546	3	6.7	199.526	CN(c1ncccc1CNc1nc(Nc2ccc3c(c2)CC(=O)N3)ncc1C(F)(F)F)S(C)(=O)=O
CHEMBL1164180	4	7.3	50.119	CN1CCN(c2ccc(-c3cnc4c(c3)N(Cc3cc(Cl)ccc3C(F)(F)F)CCN4)cn2)CC1
CHEMBL1164265	5	7	100	CN1CCN(c2ccc(-c3cnc4c(c3)N(Cc3c(F)ccc(F)c3Cl)CCN4)cn2)CC1
CHEMBL1241473	6	7	100	COc1cc(Nc2ncc([N+](=O)[O-])c(Nc3ccccc3C(N)=O)n2)cc(OC)c1OC
CHEMBL1242995	7	6.7	199.526	CCNc1nc(C)c(-c2ccnc(Nc3ccc(N4CCNCC4)cc3)n2)s1
CHEMBL1421720	8	5.6	2511.89	O=C(Cc1cccs1)Nc1nc2ccccc2s1
CHEMBL1516890	9	6.1	794.328	Cn1cc(C=C2C(=O)Nc3cccnc32)c2ccccc21
CHEMBL1779097	10	6.77	169.824	CCOc1ccc2c3c(oc2c1)C(C)(C)c1cc(OCCN(CC)CC)ccc1C3=O
CHEMBL185569	11	6.3	501.187	Cc1cccc(NC(=O)Nc2ccc(-c3cccc4c3CNC4=O)cc2)c1
CHEMBL1879463	12	6.1	794.328	Cn1c(=O)n(-c2ccc(C(C)(C)C#N)cc2)c2c3cc(-c4cnc5ccccc5c4)ccc3ncc21
CHEMBL1949855	13	4.4	39810.7	O=c1[nH]cnc2c(Cl)cccc12
CHEMBL196363	14	6.2	630.957	Cc1cccc(NC(=O)Nc2ccc(-c3csc4ncnc(N)c34)cc2)c1
CHEMBL1964441	15	5.6	2511.89	CNCC#Cc1cnc(N)c2c(-c3ccc(NC(=O)Nc4cccc(C)c4)cc3)csc12
CHEMBL1964687	16	6.8	158.489	Cc1cc(C)cc(NC(=O)Nc2ccc3c(c2)CCc2sc4ncnc(N)c4c2-3)c1
CHEMBL1965170	17	5.6	2511.89	COc1ccc(NC(=O)Nc2ccc(-c3csc4c(-c5cnn(CC(O)CO)c5)cnc(N)c34)cc2)cc1
CHEMBL1967211	18	4	100000	Fc1ccc(-c2ccc3nccn3n2)cn1
CHEMBL1967252	19	4.9	12589.3	Cc1n[nH]c2ccc(-c3cccnc3)cc12
CHEMBL1967720	20	6	1000	CC(C)(C(N)=O)n1cc(-c2cnc(N)c3c(-c4ccc(NC(=O)Nc5cccc(F)c5)cc4)csc23)cn1
CHEMBL1967875	21	5.4	3981.07	O=C(O)c1c(Cl)ccc2cc(-n3cccc3)cnc12
CHEMBL1969588	22	6.5	316.228	Clc1cc(-c2c[nH]c3ncccc23)cc(NCc2ccccc2)n1
CHEMBL1970083	23	7.6	25.119	Nc1ncc(-c2ccncc2)c2scc(-c3ccc(NC(=O)Nc4cc(C(F)(F)F)ccc4F)cc3)c12
CHEMBL1970104	24	6.4	398.107	CC(C)(C)c1ccc2nc(-c3n[nH]c4ccccc34)[nH]c2c1
CHEMBL1970142	25	6.7	199.526	CNC(=O)C(C)n1cc(-c2cnc(N)c3c(-c4ccc(NC(=O)Nc5ccc(C)cc5)cc4)csc23)cn1
CHEMBL1970290	26	6.3	501.187	CCN(CC)CCNC(=O)c1cccc(-n2nc(C(C)(C)C)cc2NC(=O)Nc2cccc3ccccc23)c1
CHEMBL1970314	27	5.9	1258.92	NC(=O)c1cc(-c2cccc(N)c2)cc2cccnc12
CHEMBL1970317	28	5.7	1995.26	Cn1cc(-c2cnc(N)c3c(-c4ccc(NC(=O)Nc5cccc(F)c5)cc4)csc23)cn1
CHEMBL1970340	29	5.2	6309.57	Nc1noc2cccc(-c3cccc(O)c3)c12
CHEMBL1970352	30	5.6	2511.89	CCOC(=O)c1c(C)n(-c2ccc(I)cc2)c2c1cc(O)c1ccccc12
CHEMBL1971021	31	6.9	125.893	Cc1cc(C)cc(NC(=O)Nc2ccc(-c3cccc4c3CNC4=O)c(C(F)(F)F)c2)c1
CHEMBL1971186	32	6.3	501.187	Fc1ccc(-c2nc3occn3c2-c2ccnc(NC3CCNCC3)n2)cc1
CHEMBL1971519	33	4.2	63095.7	Nc1n[nH]c2cccc(-c3ccc(F)cc3)c12
CHEMBL1971534	34	4.2	63095.7	NC(=O)c1cc2ccncc2s1
CHEMBL1972220	35	6.5	316.228	Nc1ncc(-c2cnn(CCO)c2)c2scc(-c3ccc(NC(=O)Nc4ccc(OC(F)F)cc4)cc3)c12
CHEMBL1972355	36	5.9	1258.92	COc1c(-c2nc3ccccc3[nH]2)c(O)cc2oc(C)cc(=O)c12
CHEMBL1972365	37	5.1	7943.28	Nc1cc2nc(-c3ccccc3)cn2cn1
CHEMBL1972584	38	7.1	79.433	CC(=O)N1CCN(C2CCC(n3nc(-c4ccc(NC(=O)c5cc6ccccc6n5C)cc4)c4c(N)ncnc43)CC2)CC1
CHEMBL1972934	39	4.4	39810.7	Nc1ncnc2sccc12
CHEMBL1973013	40	5.7	1995.26	Cc1cnc(Nc2nc(NC(C)C)ncc2Br)s1
CHEMBL1973211	41	6.3	501.187	Cc1cccc(NC(=O)Nc2ccc(-c3csc4c(C#CCN5CCCC5)cnc(N)c34)cc2)c1
CHEMBL1973363	42	5.5	3162.28	COc1cccc(NC(=O)N2CCC(c3nc4c(C(N)=O)cccc4[nH]3)CC2)c1
CHEMBL1973540	43	6.2	630.957	O=C1Nc2ccc3ncsc3c2C1=CNc1ccc(S(=O)(=O)Nc2ccccn2)cc1
CHEMBL1973720	44	6.2	630.957	NC1CCC(Nc2nc(Cl)cc(-c3c[nH]c4ncccc34)n2)CC1
CHEMBL1973961	45	7.4	39.811	COc1cc(N2CCN(C)CC2)ccc1C(=O)Nc1n[nH]c2ccc(Cc3cc(F)cc(F)c3)cc12
CHEMBL1974061	46	7.4	39.811	CCN1CCN(c2ccc(Nc3ncc(C)c(Nc4ccc5[nH]ncc5c4)n3)cc2)CC1
CHEMBL1974480	47	5.4	3981.07	CCOC(=O)Cc1nc2c3cc(Br)ccc3[nH]c(=O)n2n1
CHEMBL1975212	48	4.4	39810.7	Nc1ncnc2scc(-c3ccccc3)c12
CHEMBL1975503	49	5.2	6309.57	Nc1ccc(-c2cccn3c(=O)[nH]nc23)cc1
CHEMBL1975921	50	4.2	63095.7	O=c1[nH]c2cc(Br)cnc2[nH]1
CHEMBL1975923	51	5.8	1584.89	CC(CCC(=O)O)(c1ccc(O)c(N)c1)c1ccc(O)c(N)c1
CHEMBL1975927	52	5.6	2511.89	COc1ccc(-n2ccc3cnc(Nc4cc(OC)c(OC)c(OC)c4)nc32)cc1
CHEMBL1976420	53	5.9	1258.92	CCc1c(-c2ccc(C(C)(C)O)cc2)[nH]c2nccnc12
CHEMBL1976878	54	5.9	1258.92	Cn1cc(Nc2ncc(Br)c(Nc3ccccc3)n2)cn1
CHEMBL1978099	55	6.6	251.189	CNC(=O)COc1ccc(Nc2nc(Nc3ccc(C)c(S(N)(=O)=O)c3)ncc2F)cc1
CHEMBL1978166	56	6.2	630.957	Cc1cccc(NC(=O)Nc2ccc(-c3csc4c(C#CCCCCCCCCN)cnc(N)c34)cc2)c1
CHEMBL1978562	57	5.5	3162.28	Cn1cc(-c2cc3nc(Br)cnc3[nH]2)c2cc(C#N)ccc21
CHEMBL1980297	58	6.7	199.526	Nc1ncc(-c2cnn(CCO)c2)c2scc(-c3ccc(NC(=O)Nc4cccc(F)c4)cc3)c12
CHEMBL1980407	59	6.7	199.526	NC(COc1cncc(-c2ccc3c(c2)C(=Cc2ccc[nH]2)C(=O)N3)c1)Cc1ccccc1
CHEMBL1980671	60	5	10000	Nc1ncnc2c1C(=O)Nc1ccccc1N2
CHEMBL1981047	61	7.6	25.119	COC(C(=O)N1Cc2[nH]nc(NC(=O)c3ccc(N4CCN(C)CC4)cc3)c2C1)c1ccccc1
CHEMBL1981410	62	5.9	1258.92	CNc1ncnc2c1N=C(c1ccc(NC(=O)Nc3cccc(C(F)(F)F)c3)cc1)CCN2
CHEMBL1982413	63	5.5	3162.28	CN(Cc1cc(Cl)c(O)c2ncccc12)C1CCCCC1
CHEMBL1982466	64	6.3	501.187	Cc1ccc(NC(=O)Nc2ccc(-c3csc4c(-c5cnn(C)c5)cnc(N)c34)cc2)cc1
CHEMBL1983106	65	6	1000	COc1ccccc1Nc1nc(Nc2cnn(C)c2)ncc1Br
CHEMBL1983111	66	7	100	CC(=O)NCC(=O)N1C2CCC1c1cc(Nc3ncc(C(F)(F)F)c(NC4CCC4)n3)ccc12
CHEMBL1983348	67	5.8	1584.89	CCCCN(CCC#N)C(=O)c1ccc2nc(-c3n[nH]c4ccccc34)[nH]c2c1
CHEMBL1983430	68	6	1000	CCN1CCN(c2ccc(Nc3nccc(Nc4ccc5[nH]ncc5c4)n3)cc2)CC1
CHEMBL1983715	69	6	1000	CCNc1nc(C)c(-c2ccnc(Nc3ccc(N4CCN(C(C)=O)CC4)cc3)n2)s1
CHEMBL1983875	70	6.5	316.228	CCOc1ccc(-c2nc3ccccn3c2-c2ccnc(Nc3cccc(CCN(C)C)c3)n2)cc1
CHEMBL1983963	71	5.8	1584.89	Cc1cccc(NC(=O)Nc2ccc(-c3coc4ncnc(N)c34)cc2)c1
CHEMBL1983980	72	5.6	2511.89	O=C(Nc1nc2ccccc2s1)c1cccc2c1CN(c1nc(C(=O)O)c(-c3ccc(CO)cc3)s1)CC2
CHEMBL1984788	73	6	1000	NC(=O)c1cc(Cl)cc2[nH]c(-c3ccc(C4CCCNC4)cc3F)nc12
CHEMBL1985681	74	5.6	2511.89	N#Cc1ccc2c(c1)C(c1ccc3c(n1)CCCC3O)C(=O)N2
CHEMBL1986367	75	6.4	398.107	Cc1cccc(NC(=O)Nc2ccc(-c3csc4c(-c5ccc(NC(=O)CCCN(C)C)cc5)cnc(N)c34)cc2)c1
CHEMBL1986590	76	5.7	1995.26	O=C1Nc2ccccc2C1=Cc1c[nH]c2ccccc12
CHEMBL1987143	77	4.9	12589.3	Nc1nnc2ccc(-c3ccccc3)cn12
CHEMBL1988075	78	5.9	1258.92	Cc1ccc(-c2cnc(N)c3c(-c4ccc(NC(=O)Nc5cccc(F)c5)cc4)csc23)cn1
CHEMBL1988141	79	6.2	630.957	CCC(=O)Nc1ccc(C(=O)N2CCNCC2)c(O)c1
CHEMBL1988163	80	6.5	316.228	NS(=O)(=O)c1cccc(Nc2ncc3ccn(-c4ccccc4)c3n2)c1
CHEMBL1988387	81	6.6	251.189	Cn1cc(-c2cnc(N)c3c(-c4ccc(NC(=O)Nc5ccc(OC(F)F)cc5)cc4)csc23)cn1
CHEMBL1988437	82	5.7	1995.26	CNC(=O)c1ccccc1Sc1ccc2c(C=Cc3ccccn3)n[nH]c2c1
CHEMBL1988692	83	6.1	794.328	CC(C)NC1=NNC(=O)C1=Cc1cc2ccccc2[nH]1
CHEMBL1988717	84	6	1000	Cn1cc(-c2cnn3c(N)c(-c4ccc(NC(=O)Nc5cccc(C(F)(F)F)c5)cc4)cnc23)cn1
CHEMBL1988805	85	5.3	5011.87	N#Cc1ccc2nc(N)n(-c3nccs3)c2c1
CHEMBL1988838	86	6.7	199.526	Cc1cnc(Nc2cccc(S(N)(=O)=O)c2)nc1Nc1ccc(OCC(N)=O)cc1
CHEMBL1989029	87	6	1000	CC(C)OC1=NNC(=O)C1=Cc1c[nH]c2ccccc12
CHEMBL1989043	88	6.5	316.228	CN1CCN(c2ccc(Nc3nc(N)c(C(=O)c4c(Cl)cccc4Cl)s3)cc2)CC1
CHEMBL1989471	89	5.5	3162.28	Cc1ccnc2[nH]c3cc(C(C)C)ccc3c(=O)c12
CHEMBL1989708	90	7.2	63.096	Cc1cccc(NC(=O)Nc2ccc(-c3csc4c(-c5cnn(CC(C)O)c5)cnc(N)c34)cc2)c1
CHEMBL1991063	91	6.1	794.328	Cc1n[nH]c2ccc(-c3cncc(OCC(N)Cc4ccc(Cl)c(Cl)c4)c3)cc12
CHEMBL1991186	92	6.8	158.489	Cc1ccc(NC(=O)Nc2ccc(-c3csc4c(-c5cnn(CC(=O)N(C)C)c5)cnc(N)c34)cc2)cc1
CHEMBL1991429	93	6.1	794.328	O=C(Cc1ccccc1)Nc1cccc(-c2nc3sccn3c2-c2ccnc(Nc3cccc(N4CCCC4=O)c3)n2)c1
CHEMBL1991434	94	6.1	794.328	COc1ccc(C=C2C(=O)ON=C2c2ccc(Br)cc2)cc1OC
CHEMBL1991734	95	6	1000	CN1c2ccc(N)cc2C(c2ccccc2)c2cc(N)ccc21
CHEMBL1991986	96	6.8	158.489	CCNC(=O)c1cnc(N)c2c(-c3ccc(NC(=O)Nc4cccc(Cl)c4)cc3)csc12
CHEMBL1991999	97	5.8	1584.89	Cn1cc(Nc2ncc(Cl)c(Nc3ccccc3)n2)cn1
CHEMBL1992042	98	5.5	3162.28	O=C(Nc1cccc(C2Nc3ccc4ccccc4c3C3C=CCC32)c1)c1ccc(F)cc1
CHEMBL1992073	99	6	1000	CCC1CC(NS(=O)(=O)C2CC2)CC1c1ncc2cnc3[nH]ccc3n12
CHEMBL1992125	100	5.8	1584.89	COc1cc(Nc2ncnc(N3CCCc4cc(C)ccc43)n2)cc(OC)c1OC
CHEMBL1992371	101	5.5	3162.28	O=C(Nc1cnccn1)Nc1cccc2c(O)cccc12
CHEMBL1992527	102	7.1	79.433	Cc1cc(N2CCOCC2)cc2[nH]c(-c3c(NCC(O)c4ccccc4)cc[nH]c3=O)nc12
CHEMBL1992581	103	5.5	3162.28	O=C(Cc1ccc(-c2cccnc2)cc1)Nc1ccc(SC(F)F)cc1
CHEMBL1992673	104	4.5	31622.8	O=c1[nH]c2ccc(Cl)cc2c2ncnn12
CHEMBL1993335	105	5.6	2511.89	Cn1cc(-c2cc3nc(Br)cnc3[nH]2)c2cc(F)ccc21
CHEMBL1993904	106	5.6	2511.89	NC(=O)c1cc2c(-c3ccc(Nc4nc5ccccc5o4)cc3)cnc(N)c2s1
CHEMBL1994159	107	4.3	50118.7	CC(=O)c1cccc(-c2ccc3nccn3n2)c1
CHEMBL1994555	108	5.3	5011.87	CCc1c(-c2ccc(C(C)=O)cc2)[nH]c2nccnc12
CHEMBL1994669	109	6.9	125.893	Cn1cc(Nc2ncc(Br)c(Nc3ccccc3C(N)=O)n2)cn1
CHEMBL1995765	110	4.5	31622.8	Nc1cc(=O)[nH]n1-c1ccccn1
CHEMBL1996048	111	6.4	398.107	Cc1ccc(-c2cc3c(NCCN)ccc(C(N)=O)c3[nH]2)cc1
CHEMBL1996702	112	6.6	251.189	COc1cc(-c2ccc3c(c2)Nc2ccc(C(=O)NCCCN(C)C)cc2NC3=O)ccc1O
CHEMBL1996979	113	6	1000	O=C(Nc1cnc2[nH]cc(-c3ccccc3)c2c1)c1c(F)cccc1F
CHEMBL1997025	114	5.6	2511.89	NC(=O)c1cccc2[nH]c(-c3ccc(C4CCCNC4)cc3F)nc12
CHEMBL1997041	115	5.3	5011.87	Cc1cc(-c2ncnc3[nH]ccc23)ccc1F
CHEMBL1997193	116	5.7	1995.26	Cc1ccc(-c2cc(-c3cc(Br)ccc3O)[nH]c(=O)c2C#N)s1
CHEMBL199723	117	6.699	199.986	CN1CCN(CCc2ccc(NC(=O)c3cc(-c4ccc5c(c4)OCO5)cnc3O)cc2)CC1
CHEMBL1997275	118	5.2	6309.57	COc1ccc2[nH]cc(C=C3C(=O)Nc4ccccc43)c2c1
CHEMBL1997335	119	5.8	1584.89	COc1ccc(-c2n[nH]c3cccc4c(OC)ccc2c34)cc1OC
CHEMBL1997617	120	6.7	199.526	CN1CCN(C2CCC(n3cc(-c4ccc(Oc5ccccc5)cc4)c4c(N)ncnc43)CC2)CC1
CHEMBL1998477	121	5.3	5011.87	CS(=O)(=O)c1cccc(-c2cnn3c(C(N)=O)cc(-c4ccccc4)nc23)c1
CHEMBL1998585	122	7.9	12.589	Nc1ncnc2scc(-c3ccc(NC(=O)Nc4cc(C(F)(F)F)ccc4F)cc3)c12
CHEMBL1998773	123	5.4	3981.07	OCCc1ccc(Nc2ncnc3[nH]cc(-c4ccccc4)c23)cc1
CHEMBL1999414	124	6.3	501.187	CCN(CC)CCCNC(=O)c1cnc(N)c2c(-c3ccc(NC(=O)Nc4cccc(C)c4)cc3)csc12
CHEMBL1999484	125	6.6	251.189	CNc1nc(C)c(-c2ccnc(Nc3ccc(N4CCNCC4)cc3)n2)s1
CHEMBL1999485	126	6.3	501.187	CCN1CCN(c2ccc(Nc3ncc(Cl)c(Nc4ccc(O)c(NC(C)=O)c4)n3)cc2)CC1
CHEMBL2000393	127	7.3	50.119	O=c1[nH]c2cnc(-n3cnc4ccc(F)cc43)nc2n1C1CCOc2c(F)cccc21
CHEMBL2000645	128	5.6	2511.89	Cn1cc(Nc2ncc(Br)c(Nc3ccccc3S(C)(=O)=O)n2)cn1
CHEMBL2000879	129	4.3	50118.7	c1ccc(C2CCc3[nH]ncc3C2)cc1
CHEMBL2001485	130	6.8	158.489	Cc1ccc(NC(=O)Nc2ccc(-c3csc4c(-c5cnn(C(C)C(=O)N(C)C)c5)cnc(N)c34)cc2)cc1
CHEMBL2001613	131	4.1	79432.8	O=c1[nH][nH]c2ccc(Br)cc12
CHEMBL2002586	132	5.6	2511.89	Clc1cc(Nc2nc(NC3CC3)c3sccc3n2)ccc1N1CCOCC1
CHEMBL2002702	133	6.7	199.526	Cc1cc(C)c(C=C2C(=O)Nc3ccccc32)[nH]1
CHEMBL2002723	134	5.7	1995.26	CC(=O)Nc1ccc(-n2nc3ccc(N)nc3n2)cc1
CHEMBL2004290	135	5.9	1258.92	COc1ccc(NC(=O)Nc2ccc(-c3csc4c(-c5cnn(CC(C)(C)O)c5)cnc(N)c34)cc2)cc1
CHEMBL2004311	136	6.8	158.489	Cc1cc(C)cc(NC(=O)Nc2ccc(-c3cccc4c3CNC4=O)c(C)c2)c1
CHEMBL2004515	137	5.3	5011.87	c1nc(-c2ccc3c(c2)OCO3)c2cc[nH]c2n1
CHEMBL2004716	138	6.2	630.957	CCN(CC)CCNC(=O)C=Cc1cnc(N)c2c(-c3ccc(NC(=O)Nc4cccc(C)c4)cc3)csc12
CHEMBL2005449	139	6.1	794.328	Cc1cc(Nc2nc(Cl)cc(NCc3ccccc3)n2)n[nH]1
CHEMBL2005478	140	5.5	3162.28	COc1ccc2c(c1)c(-c1cc3nc(Br)cnc3[nH]1)cn2C
CHEMBL2005714	141	6.9	125.893	Cc1cc(N2CCOCC2)cc2[nH]c(-c3c(NCCc4ccccc4)cc[nH]c3=O)nc12
CHEMBL2005886	142	6.6	251.189	Cc1cc(N2CCOCC2)cc2[nH]c(-c3c(NCC(O)c4cccc(Cl)c4)cc[nH]c3=O)nc12
CHEMBL2005953	143	5.5	3162.28	Cn1cc(Nc2ncc(Br)c(Nc3cccc(C(N)=O)c3)n2)cn1
CHEMBL2006564	144	6.9	125.893	CCN(C(C)=O)c1ccc(Nc2nc(NC3CC3)c3nc[nH]c3n2)cc1
CHEMBL2006765	145	6.7	199.526	CCCNC(=O)c1ccc(Nc2nc(NCC(F)(F)F)c3cc[nH]c3n2)cc1
CHEMBL2007064	146	6.7	199.526	Cc1[nH]c(C=C2C(=O)Nc3ccccc32)c(C)c1CCC(=O)O
CHEMBL2007097	147	4.1	79432.8	Nc1nc(=O)[nH]c2sccc12
CHEMBL2007421	148	6.9	125.893	CC(C)Oc1cc(Nc2nc(NC(C)c3ccc(F)cn3)ncc2Cl)n[nH]1
CHEMBL2007574	149	5.4	3981.07	Nc1nc(Cl)cc(-c2c[nH]c3ncccc23)n1
CHEMBL21156	150	6.8	158.489	CC(C)(C)c1nc2c3ccc(F)cc3c3c(=O)[nH]ccc3c2[nH]1
CHEMBL220057	151	5.8	1584.89	Cc1cccc(NC(=O)Nc2ccc(-c3cccc4[nH]nc(N)c34)cc2)c1
CHEMBL242865	152	5.8	1584.89	O=C(O)c1ccccc1Nc1ccnc(Nc2ccc([N+](=O)[O-])cc2)n1
CHEMBL244378	153	5.8	1584.89	O=C(O)c1ccccc1Nc1ccnc(Nc2ccc3cn[nH]c3c2)n1
CHEMBL262623	154	5	10000	Nc1ncnc2c1N=C(c1ccccc1)CCN2
CHEMBL3124972	155	8.959	1.099	Cc1nc([C@@](C)(O)CO)sc1-c1cnc(N)c(O[C@H](C)c2cc(F)ccc2-n2nccn2)c1
CHEMBL3128058	156	8.553	2.799	C[C@@H](Oc1cc(-c2cn(C)nc2C#N)cnc1N)c1cc(F)ccc1-n1nccn1
CHEMBL3128059	157	8.125	7.499	C[C@@H](Oc1cc(-c2ccnn2C)cnc1N)c1cc(F)ccc1-n1nccn1
CHEMBL3128061	158	8.886	1.3	COc1ncccc1-c1cnc(N)c(O[C@H](C)c2cc(F)ccc2-n2nccn2)c1
CHEMBL3128062	159	7.824	14.997	COc1ncncc1-c1cnc(N)c(O[C@H](C)c2cc(F)ccc2-n2nccn2)c1
CHEMBL3128063	160	8.215	6.095	Cc1nc(C(C)(C)O)ccc1-c1cnc(N)c(O[C@H](C)c2cc(F)ccc2-n2nccn2)c1
CHEMBL3128064	161	9.398	0.4	Cc1nc(C(C)(C)O)sc1-c1cnc(N)c(O[C@H](C)c2cc(F)ccc2-n2nccn2)c1
CHEMBL3128070	162	8.301	5	C[C@@H](Oc1cc(-c2cnn(C3CCNCC3)c2)cnc1N)c1cc(F)ccc1Cl
CHEMBL3128071	163	7.796	15.996	Cc1n[nH]cc1-c1cnc(N)c(O[C@H](C)c2cc(F)ccc2F)c1
CHEMBL3128072	164	7.959	10.99	Cc1n[nH]cc1-c1cnc(N)c(O[C@@H](C)c2cc(F)ccc2C#N)c1
CHEMBL3128073	165	8.699	2	COc1ccc(F)cc1[C@@H](C)Oc1cc(-c2c[nH]nc2C)cnc1N
CHEMBL3128074	166	8.585	2.6	Cc1n[nH]cc1-c1cnc(N)c(O[C@H](C)c2cc(F)ccc2-n2nccn2)c1
CHEMBL3128075	167	8.585	2.6	Cc1nn(C)cc1-c1cnc(N)c(O[C@H](C)c2cc(F)ccc2-n2nccn2)c1
CHEMBL3145328	168	6.7	199.526	Cc1[nH]n(-c2nc3ccccc3[nH]2)c(=O)c1C1OC(=O)c2ccccc21
CHEMBL3286808	169	8.398	3.999	COc1ccc(F)cc1[C@@H](C)Oc1cc(-c2cnnn2C)cnc1N
CHEMBL3286812	170	8.086	8.204	CNC(=O)c1ccc(F)cc1[C@@H](C)Oc1nc(-c2cccnc2OC)cnc1N
CHEMBL3286814	171	8.796	1.6	N#Cc1[nH]nc2c1-c1cnc(N)c(c1)OCc1cc(F)ccc1OCC2
CHEMBL3286815	172	9.658	0.22	N#Cc1[nH]nc2c1-c1cnc(N)c(c1)OCc1cc(F)ccc1OCCC2
CHEMBL3286816	173	9.42	0.38	Cn1ncc2c1-c1cnc(N)c(c1)OCc1cc(F)ccc1OCCC2
CHEMBL3286818	174	9.244	0.57	C[C@H]1Oc2cc(cnc2N)-c2c(nn(C)c2C#N)CCOc2ccc(F)cc21
CHEMBL3286819	175	9.208	0.619	C[C@H]1Oc2cc(cnc2N)-c2c(nn(C)c2C#N)CCCOc2ccc(F)cc21
CHEMBL3286820	176	9.538	0.29	Cc1nn(C)c2c1-c1cnc(N)c(c1)O[C@H](C)c1cc(F)ccc1C(=O)N(C)C2
CHEMBL3286822	177	8.721	1.901	Cc1nn(C)c2c1-c1cnc(N)c(c1)OCc1cc(F)ccc1C(=O)N(C)C2
CHEMBL3286823	178	10	0.1	Cc1nn(C)c2c1-c1cnc(N)c(n1)O[C@H](C)c1cc(F)ccc1C(=O)N(C)C2
CHEMBL3286830	179	9.155	0.7	C[C@H]1Oc2cc(cnc2N)-c2c(nn(C)c2C#N)CN(C)C(=O)c2ccc(F)cc21
CHEMBL3286831	180	8.699	2	Cc1cnc2nc3c(n2c1)-c1cnc(N)c(c1)O[C@H](C)c1cc(F)ccc1C(=O)N(C)C3
CHEMBL3286832	181	9.252	0.56	C[C@H]1Oc2nc(cnc2N)-c2c(nc3ccc(C#N)cn23)CN(C)C(=O)c2ccc(F)cc21
CHEMBL3288854	182	7.022	95.06	Cc1[nH]c(/C=C2\C(=O)Nc3ccc(F)cc32)c(C)c1NC(=O)CCN1CCN(C)CC1
CHEMBL370800	183	6.301	500.035	CN1CCN(Cc2ccc(NC(=O)c3cc(-c4ccc5c(c4)OCO5)cnc3O)cc2)CC1
CHEMBL379975	184	5.5	3162.28	O=C1NC(=O)c2c1c(-c1ccccc1Cl)cc1[nH]c3ccc(O)cc3c21
CHEMBL381738	185	5.959	1099.01	CN1CCN(CCCc2ccc(NC(=O)c3cc(-c4ccc5c(c4)OCO5)cnc3O)cc2)CC1
CHEMBL385478	186	6	1000	c1cnc2[nH]cc(-c3ccnc(NC4CCCCC4)n3)c2c1
CHEMBL3891699	187	9	1	COc1cc(C(=O)NCCN2CCCC2)ccc1Nc1nc(Cc2c(Cl)cccc2Cl)n2ccnc2c1C(N)=O
CHEMBL3903868	188	7.102	79.068	COc1cc(N2CCNCC2)ccc1Nc1nc(N2CCCC2)n2ccnc2c1C(N)=O
CHEMBL3905248	189	8.398	3.999	COc1cc(C(=O)N2CCN(C)CC2)ccc1Nc1nc(Cc2c(Cl)cccc2Cl)c2nc[nH]c2c1C(N)=O
CHEMBL3912006	190	8.301	5	COc1cc(C(=O)N2CCN(C)CC2)ccc1Nc1nc(Cc2c(Cl)cccc2Cl)n2ccnc2c1C(N)=O
CHEMBL3913589	191	8.398	3.999	NC(=O)c1c(Nc2ccc(N3CCNCC3)cc2OC(F)(F)F)nc(Cc2c(Cl)cccc2Cl)c2nc[nH]c12
CHEMBL3919748	192	9	1	COc1cc(C(=O)NCCN(C)C)ccc1Nc1nc(Cc2c(Cl)cccc2Cl)c2nc[nH]c2c1C(N)=O
CHEMBL3926619	193	8.699	2	CCc1nnc2c(C(N)=O)c(Nc3ccc(C4CCNCC4)cc3Cl)nc(Cc3ccccc3Cl)n12
CHEMBL3927674	194	7.745	17.989	CCc1cn2c(Cc3ccccc3Cl)nc(Nc3ccc(N4CCNCC4)cc3OC)c(C(N)=O)c2n1
CHEMBL3935393	195	8.699	2	COc1cc(C(=O)N2CCNCC2)ccc1Nc1nc(Cc2c(Cl)cccc2Cl)c2nc[nH]c2c1C(N)=O
CHEMBL3941424	196	8.097	7.998	COc1cc(C2CCNCC2)ccc1Nc1nc(Cc2ccccc2F)n2cnnc2c1C(N)=O
CHEMBL3949172	197	9	1	COc1cc(C(=O)NCCN(C)C)ccc1Nc1nc(Cc2c(Cl)cccc2Cl)n2ccnc2c1C(N)=O
CHEMBL3949679	198	8.398	3.999	COc1cc(C(=O)NCCCN2CCOCC2)ccc1Nc1nc(Cc2c(Cl)cccc2Cl)n2ccnc2c1C(N)=O
CHEMBL3950416	199	8.824	1.5	COc1c(Nc2nc(Cc3c(Cl)cccc3Cl)c3nc[nH]c3c2C(N)=O)ccc(N2CCNCC2)c1F
CHEMBL3950825	200	8.699	2	COc1cc(N2CCNCC2)ccc1Nc1nc(Cc2c(Cl)cccc2Cl)n2c(C)nnc2c1C(N)=O
CHEMBL3956713	201	8.301	5	COc1cc(C(=O)N2CCOCC2)ccc1Nc1nc(Cc2c(Cl)cccc2Cl)n2ccnc2c1C(N)=O
CHEMBL3961811	202	9	1	COc1cc(C(=O)NCCN2CCCCC2)ccc1Nc1nc(Cc2c(Cl)cccc2Cl)n2ccnc2c1C(N)=O
CHEMBL3962374	203	7.886	13.002	CCNC(=O)c1cn2c(Cc3c(Cl)cccc3Cl)nc(Nc3ccc(N4CCNCC4)cc3OC)c(C(N)=O)c2n1
CHEMBL3964023	204	8.222	5.998	COc1cc(C2CCNCC2)ccc1Nc1nc(Cc2cccc(F)c2F)n2cnnc2c1C(N)=O
CHEMBL3965445	205	8.097	7.998	NC(=O)c1c(Nc2ccc(N3CCNCC3)cc2C(F)(F)F)nc(Cc2c(Cl)cccc2Cl)c2nc[nH]c12
CHEMBL3965838	206	9	1	CCOC(=O)c1cn2c(Cc3c(Cl)cccc3Cl)nc(Nc3ccc(N4CCNCC4)cc3OC)c(C(N)=O)c2n1
CHEMBL3966854	207	8.699	2	COc1cc(N2CCN3CCCC3C2)ccc1Nc1nc(Cc2c(Cl)cccc2Cl)c2nc[nH]c2c1C(N)=O
CHEMBL3978742	208	9	1	COc1cc(C(=O)N2CCNCC2)ccc1Nc1nc(Cc2c(Cl)cccc2Cl)n2ccnc2c1C(N)=O
CHEMBL3978977	209	7.959	10.99	CCc1nnc2c(C(N)=O)c(Nc3ccc(N4CCNCC4)cc3OC)nc(Cc3ccccc3Cl)n12
CHEMBL3983410	210	7.824	14.997	COc1ccc(N2CCNCC2)cc1Nc1nc(Cc2c(Cl)cccc2Cl)c2nc[nH]c2c1C(N)=O
CHEMBL3986050	211	8.523	2.999	COc1cc(C(=O)NCCCCN(C)C)ccc1Nc1nc(Cc2c(Cl)cccc2Cl)n2ccnc2c1C(N)=O
CHEMBL404367	212	5.9	1258.92	Cc1cccc(NC(=O)Nc2ccc(-c3cncc4c3c(N)nn4C)cc2)c1
CHEMBL411903	213	8.4	3.981	Nc1ncnc2c1N=C(c1ccc(NC(=O)Nc3cc(C(F)(F)F)ccc3F)cc1)CCN2
CHEMBL4130209	214	8.398	3.999	C[C@H]1Oc2cc(cnc2N)-c2c(nn(C)c2C#N)CN(C)C(=O)c2ccccc21
CHEMBL422897	215	6.2	630.957	CN1CCC(c2c(O)cc(O)c3c(=O)cc(-c4ccccc4Cl)oc23)C(O)C1
CHEMBL4286522	216	9.538	0.29	Cc1[nH][n+](C)c2c1-c1cnc(N)c(c1)O[C@H](C)c1cc(F)ccc1C(=O)N(C)C2
CHEMBL436509	217	6.222	599.791	CN1CCN(c2ccc(NC(=O)c3cc(-c4ccc5c(c4)OCO5)cnc3O)cc2)CC1
CHEMBL4436406	218	9.155	0.7	C[C@H]1Oc2cc(cnc2N)Cc2c(nn(C)c2C#N)CN(C)C(=O)c2ccc(F)cc21
CHEMBL482538	219	5.1	7943.28	c1ccc(-c2ccnc3[nH]ccc23)cc1
CHEMBL522892	220	6.2	630.957	CN1CCN(c2ccc3nc(-c4c(N)c5c(F)cccc5[nH]c4=O)[nH]c3c2)CC1
CHEMBL546797	221	5.8	1584.89	ON=C(c1nc2ccccc2[nH]1)c1nc2ccccc2[nH]1
CHEMBL550275	222	5.8	1584.89	Nc1ccc2cc(NCCc3ccccc3)cc(Nc3ncccn3)c2n1
CHEMBL550418	223	5.8	1584.89	COc1cc(-c2ccc3c(c2)Nc2c(O)cccc2NC3=O)ccc1O
CHEMBL553	224	5.6	2511.89	C#Cc1cccc(Nc2ncnc3cc(OCCOC)c(OCCOC)cc23)c1
