# Supplementary material for: QSAR, Molecular Docking, MD Simulation and MMGBSA Calculations Approaches to Recognize Concealed Pharmacophoric Features Requisite for the Optimization of ALK Tyrosine Kinase Inhibitors as Anticancer Leads
Source: Molecules. 2022 Aug 3;27(15):4951. doi: 10.3390/molecules27154951 (PMC9370430; doi:10.3390/molecules27154951)
Supplement: Supplementary file 1 [file molecules-27-04951-s001.zip › Table S2.xlsx]

## Sheet: Sheet1
Table S2: The values for selected molecular descriptors present in QSAR models
sn	pki	rsa	notringO_F_5B	N_plaN_4B	ringC_lipo_2B	notringO_S_5B	notringO_acc_5B	fplaNN4B
1	6	0.613289	0	4	15	0	2	0
2	6.2	0.598578	0	7	16	0	0	0
3	6.7	0.641448	0	6	16	2	3	2
4	7.3	0.648277	0	6	16	0	0	0
5	7	0.651127	0	6	16	0	0	0
6	7	0.619972	0	6	12	0	6	1
7	6.7	0.61054	0	7	12	0	0	0
8	5.6	0.562114	0	0	11	1	1	0
9	6.1	0.583751	0	1	15	0	1	0
10	6.77	0.639512	0	0	16	0	3	0
11	6.3	0.599034	0	0	20	0	2	0
12	6.1	0.687671	0	0	23	0	1	0
13	4.4	0.520885	0	0	7	0	1	0
14	6.2	0.600362	0	3	17	0	1	1
15	5.6	0.605238	0	2	19	0	1	0
16	6.8	0.613521	0	3	19	0	1	1
17	5.6	0.628822	0	4	22	0	4	0
18	4	0.533094	0	3	9	0	0	0
19	4.9	0.552718	0	2	12	0	0	0
20	6	0.636291	0	5	22	0	2	0
21	5.4	0.571319	0	2	13	0	2	0
22	6.5	0.58975	0	4	18	0	0	0
23	7.6	0.619802	1	2	24	0	1	0
24	6.4	0.601034	0	4	14	0	0	0
25	6.7	0.629471	0	5	22	0	2	0
26	6.3	0.650404	0	4	19	0	2	1
27	5.9	0.57834	0	1	15	0	1	0
28	5.7	0.613886	0	4	22	0	1	0
29	5.2	0.566845	0	2	13	0	0	0
30	5.6	0.628299	0	1	18	0	2	0
31	6.9	0.629933	0	0	20	0	2	0
32	6.3	0.614241	0	6	16	0	0	1
33	4.2	0.565628	0	3	13	0	0	0
34	4.2	0.520686	0	0	7	1	1	0
35	6.5	0.626534	1	4	22	0	3	0
36	5.9	0.589697	0	2	16	0	3	0
37	5.1	0.54514	0	4	11	0	0	0
38	7.1	0.66183	0	7	24	0	2	0
39	4.4	0.502617	0	3	5	0	0	1
40	5.7	0.57629	0	5	6	0	0	0
41	6.3	0.618692	0	2	23	0	1	0
42	5.5	0.613581	0	2	18	0	3	0
43	6.2	0.609439	0	2	20	3	3	1
44	6.2	0.603222	0	5	16	0	0	0
45	7.4	0.641608	0	5	19	0	2	0
46	7.4	0.620596	0	8	16	0	0	0
47	5.4	0.574988	0	4	8	0	3	0
48	4.4	0.55732	0	3	11	0	0	1
49	5.2	0.561086	0	1	11	0	1	0
50	4.2	0.50451	0	0	5	0	1	0
51	5.8	0.642581	0	2	12	0	2	0
52	5.6	0.609694	0	4	17	0	4	0
53	5.9	0.614859	0	3	10	0	0	0
54	5.9	0.573386	0	6	9	0	0	0
55	6.6	0.615481	0	4	15	2	4	0
56	6.2	0.623196	0	2	19	0	1	0
57	5.5	0.578604	0	4	14	0	0	0
58	6.7	0.621385	0	4	22	0	2	0
59	6.7	0.617087	0	1	23	0	2	0
60	5	0.552679	0	5	10	0	1	0
61	7.6	0.64457	0	6	17	0	3	0
62	5.9	0.611266	0	5	15	0	1	0
63	5.5	0.632998	0	0	15	0	1	0
64	6.3	0.616296	0	4	22	0	1	0
65	6	0.589049	0	6	9	0	1	0
66	7	0.626064	0	4	17	0	2	0
67	5.8	0.626861	0	4	14	0	1	0
68	6	0.614353	0	8	16	0	0	0
69	6	0.624747	0	7	12	0	1	0
70	6.5	0.628041	0	5	22	0	1	0
71	5.8	0.599236	0	3	17	0	1	1
72	5.6	0.626069	0	2	25	3	3	0
73	6	0.610889	0	2	18	0	1	0
74	5.6	0.592609	0	0	17	0	2	0
75	6.4	0.640496	0	2	25	0	2	0
76	5.7	0.573921	0	1	16	0	1	0
77	4.9	0.550121	0	4	11	0	0	0
78	5.9	0.616481	0	2	24	0	1	0
79	6.2	0.599995	0	0	6	0	3	0
80	6.5	0.596147	0	4	17	2	2	0
81	6.6	0.618461	1	4	22	0	2	0
82	5.7	0.599765	0	2	18	1	1	0
83	6.1	0.582872	0	4	11	0	1	0
84	6	0.619266	0	6	21	0	1	0
85	5.3	0.550386	0	4	9	0	0	0
86	6.7	0.60702	0	4	15	2	4	0
87	6	0.583024	0	1	11	0	2	0
88	6.5	0.630525	0	5	15	1	1	0
89	5.5	0.59188	0	2	12	0	1	0
90	7.2	0.63391	0	4	22	0	2	0
91	6.1	0.616469	0	2	18	0	1	0
92	6.8	0.64019	0	5	22	0	2	0
93	6.1	0.632774	0	6	30	0	2	1
94	6.1	0.596969	0	0	15	0	3	0
95	6	0.623484	0	3	19	0	0	0
96	6.8	0.614839	0	2	19	1	2	0
97	5.8	0.572259	0	6	9	0	0	0
98	5.5	0.629812	0	1	28	0	1	0
99	6	0.642325	0	4	13	2	2	0
100	5.8	0.615347	0	5	15	0	3	0
101	5.5	0.569457	0	0	10	0	1	0
102	7.1	0.649886	0	5	18	0	1	1
103	5.5	0.601309	0	0	17	0	1	0
104	4.5	0.538754	0	4	7	0	1	0
105	5.6	0.578285	0	4	14	0	0	0
106	5.6	0.598733	0	4	19	1	1	0
107	4.3	0.559919	0	3	10	0	1	0
108	5.3	0.596301	0	3	10	0	1	0
109	6.9	0.594183	0	7	9	0	1	1
110	4.5	0.527905	0	4	8	0	1	0
111	6.4	0.593454	0	4	14	0	1	1
112	6.6	0.626397	0	2	19	0	4	0
113	6	0.594554	1	2	19	0	1	0
114	5.6	0.606765	0	2	18	0	1	0
115	5.3	0.559667	0	3	11	0	0	1
116	5.7	0.59431	0	0	15	1	1	0
117	6.699	0.627103	0	0	17	0	2	0
118	5.2	0.583062	0	1	16	0	2	0
119	5.8	0.599494	0	2	17	0	3	0
120	6.7	0.651625	0	4	23	0	1	0
121	5.3	0.607845	0	4	18	2	3	0
122	7.9	0.60725	1	3	17	0	1	1
123	5.4	0.605772	0	4	17	0	0	0
124	6.3	0.638989	0	2	19	1	2	0
125	6.6	0.609556	0	7	12	0	0	0
126	6.3	0.632035	0	7	15	0	2	1
127	7.3	0.615487	0	5	15	0	1	1
128	5.6	0.603414	0	6	9	2	2	0
129	4.3	0.56345	0	2	13	0	0	0
130	6.8	0.648819	0	5	22	0	2	0
131	4.1	0.51249	0	2	7	0	1	0
132	5.6	0.612255	0	5	14	0	0	0
133	6.7	0.571323	0	1	12	0	1	0
134	5.7	0.56658	0	5	11	0	1	0
135	5.9	0.643271	0	4	22	0	3	0
136	6.8	0.621742	0	0	20	0	2	0
137	5.3	0.550473	0	3	11	0	0	1
138	6.2	0.639689	0	2	19	0	2	0
139	6.1	0.577155	0	6	12	0	0	0
140	5.5	0.584597	0	4	14	0	1	0
141	6.9	0.634004	0	5	18	0	1	1
142	6.6	0.650833	0	5	18	0	1	1
143	5.5	0.586233	0	6	9	0	1	0
144	6.9	0.609637	0	6	9	0	1	0
145	6.7	0.597311	0	5	11	0	1	0
146	6.7	0.610923	0	1	12	0	3	0
147	4.1	0.512316	0	3	5	1	1	1
148	6.9	0.619277	0	7	11	0	1	0
149	5.4	0.548956	0	5	10	0	0	0
150	6.8	0.61595	0	2	14	0	1	0
151	5.8	0.603146	0	3	19	0	1	0
152	5.8	0.584891	0	5	15	0	4	0
153	5.8	0.581568	0	6	16	0	2	0
154	5	0.569404	0	5	9	0	0	0
155	8.959	0.661283	1	5	14	3	3	0
156	8.553	0.624111	1	8	14	0	1	1
157	8.125	0.625728	1	7	14	0	1	0
158	8.886	0.646122	1	5	16	0	2	0
159	7.824	0.649668	1	5	14	0	2	0
160	8.215	0.663834	1	5	16	0	2	0
161	9.398	0.660153	1	5	14	2	2	0
162	8.301	0.634514	1	5	19	0	1	1
163	7.796	0.617015	1	4	14	0	1	0
164	7.959	0.623112	1	4	14	0	1	0
165	8.699	0.616272	2	4	14	0	2	0
166	8.585	0.641317	1	7	14	0	1	0
167	8.585	0.650203	1	7	14	0	1	0
168	6.7	0.611904	0	4	17	0	2	0
169	8.398	0.61569	2	5	13	0	2	0
170	8.086	0.630768	1	3	13	0	3	0
171	8.796	0.633781	2	5	14	0	2	0
172	9.658	0.667096	2	5	14	0	2	0
173	9.42	0.656029	2	4	14	0	2	0
174	9.244	0.649044	2	5	14	0	2	0
175	9.208	0.680338	2	5	14	0	2	0
176	9.538	0.692634	1	5	14	0	2	0
177	8.721	0.672204	1	5	14	0	2	0
178	10	0.681696	1	6	11	0	2	0
179	9.155	0.675829	1	6	14	0	2	1
180	8.699	0.677465	1	6	16	0	2	1
181	9.252	0.668185	1	7	11	0	2	2
182	7.022	0.644444	0	2	12	0	2	0
183	6.301	0.625324	0	0	17	0	2	0
184	5.5	0.611739	0	1	20	0	2	0
185	5.959	0.629297	0	0	17	0	2	0
186	6	0.593213	0	5	16	0	0	0
187	9	0.711945	0	5	20	0	3	1
188	7.102	0.642265	0	8	13	0	2	1
189	8.398	0.71138	0	5	17	0	3	1
190	8.301	0.720698	0	5	16	0	3	1
191	8.398	0.723898	1	7	17	0	2	1
192	9	0.709595	0	5	17	0	3	1
193	8.699	0.718177	0	6	22	0	1	1
194	7.745	0.659797	0	7	18	0	2	1
195	8.699	0.707927	0	5	17	0	3	1
196	8.097	0.643307	0	6	21	0	2	1
197	9	0.716689	0	5	16	0	3	1
198	8.398	0.708061	0	5	16	0	3	1
199	8.824	0.709952	1	7	17	0	2	1
200	8.699	0.711982	0	8	17	0	2	1
201	8.301	0.713806	0	5	16	0	3	1
202	9	0.697394	0	5	21	0	3	1
203	7.886	0.690792	0	8	16	0	3	2
204	8.222	0.654697	0	6	21	0	2	1
205	8.097	0.727632	0	7	17	0	1	1
206	9	0.694532	0	7	16	0	4	1
207	8.699	0.709149	0	7	22	0	2	1
208	9	0.716165	0	5	16	0	3	1
209	7.959	0.706437	0	8	17	0	2	1
210	7.824	0.694208	0	7	17	0	2	1
211	8.523	0.695142	0	5	16	0	3	1
212	5.9	0.610905	0	4	18	0	1	0
213	8.4	0.61258	1	5	15	0	1	0
214	8.398	0.677081	0	6	14	0	2	1
215	6.2	0.641112	0	0	20	0	4	0
216	9.538	0.697538	1	5	14	0	2	0
217	6.222	0.618255	0	2	17	0	2	0
218	9.155	0.705555	1	6	14	0	2	1
219	5.1	0.546741	0	2	13	0	0	0
220	6.2	0.615704	0	6	16	0	1	1
221	5.8	0.556158	0	5	12	0	1	0
222	5.8	0.595707	0	6	18	0	0	0
223	5.8	0.608601	0	2	19	0	3	0
224	5.6	0.590646	0	3	13	0	4	1
