# Supplementary material for: QSAR, Molecular Docking, MD Simulation and MMGBSA Calculations Approaches to Recognize Concealed Pharmacophoric Features Requisite for the Optimization of ALK Tyrosine Kinase Inhibitors as Anticancer Leads
Source: Molecules. 2022 Aug 3;27(15):4951. doi: 10.3390/molecules27154951 (PMC9370430; doi:10.3390/molecules27154951)
Supplement: Supplementary file 1 [file molecules-27-04951-s001.zip › Table S3.xlsx]

## Sheet: Univariate divided set model de
Table S3: Details regarding performance of Univariate Divided set model 1.1. containing Different graphs associated with model
Variable	Coeff.	Std. coeff.	Std. err.	(+/-) Co. int. 95%	p-value
Intercept	-8.9046		0.7742	1.5279	0
rsa	25.0813	0.833	1.2487	2.4641	0
(Fitting criteria)
R2: 0.6939		R2adj: 0.6922		R2-R2adj: 0.0017		LOF: 0.5740
Kxx: 0.0000		Delta K: 0.8330		RMSE tr: 0.7492		MAE tr: 0.5750
RSS tr: 101.0320		CCC tr: 0.8193		s: 0.7534		F: 403.4654
(Internal validation criteria)
Q2loo: 0.6881		R2-Q2loo: 0.0057		RMSE cv: 0.7562		MAE cv: 0.5808
PRESS cv: 102.9290		CCC cv: 0.8161
Q2LMO: 0.6854		R2Yscr: 0.0054		Q2Yscr: -0.0172		RMSE AV Yscr: 1.3504
R2Xrnd:		Q2Xrnd:		R2Yrnd:		Q2Yrnd:
(External validation criteria)
RMSE ext: 0.7955		MAE ext: 0.6173		PRESS ext: 27.8410		R2ext: 0.6544
Q2-F1: 0.6413		Q2-F2: 0.6388		Q2-F3: 0.6549		CCC ext: 0.8064
r2m aver.: 0.5297		r2m delta: 0.1010
Calc. external data regr. angle from diagonal: -8.0454°
Predictions by LOO:
Exp(x) vs. Pred(y): R2: 0.6881	R'2o: 0.5571	k': 0.9875	Clos': 0.1904	r'2m: 0.4391
Pred(x) vs. Exp(y): R2: 0.6881	R2o: 0.6881	k: 0.9999	Clos: 0.0000	r2m: 0.6851
External predictions by model equation:
Exp(x) vs. Pred(y): R2: 0.6544	R'2o: 0.5827	k': 0.9966	Clos': 0.1096	r'2m: 0.4792
Pred(x) vs. Exp(y): R2: 0.6544	R2o: 0.6415	k: 0.9899	Clos: 0.0197	r2m: 0.5802
ID	Name	Status	Exp. endpoint	Pred. by model eq.	Pred.Mod.Eq.Res.	Pred. LOO	Pred. LOO Res.	HAT i/i (h*=0.0333)	Std.Pred.Mod.Eq. Res.	Std.Pred.LOO Res.
1	1	Prediction	6	6.4775	0.4775	-	-	0.0056	0.6356	0.6356
2	2	Training	6.2	6.1085	-0.0915	6.1079	-0.0921	0.0066	-0.1218	-0.1226
3	3	Training	6.7	7.1838	0.4838	7.1872	0.4872	0.007	0.6444	0.6489
4	4	Training	7.3	7.3551	0.0551	7.3555	0.0555	0.008	0.0734	0.074
5	5	Training	7	7.4265	0.4265	7.4302	0.4302	0.0085	0.5686	0.5734
6	6	Training	7	6.6451	-0.3549	6.6431	-0.3569	0.0056	-0.4723	-0.475
7	7	Training	6.7	6.4086	-0.2914	6.4069	-0.2931	0.0057	-0.3879	-0.3902
8	8	Training	5.6	5.194	-0.406	5.1881	-0.4119	0.0143	-0.5428	-0.5507
9	9	Prediction	6.1	5.7367	-0.3633	-	-	0.0089	-0.4844	-0.4844
10	10	Training	6.77	7.1352	0.3652	7.1377	0.3677	0.0068	0.4864	0.4898
11	11	Training	6.3	6.12	-0.18	6.1188	-0.1812	0.0066	-0.2397	-0.2413
12	12	Prediction	6.1	8.3431	2.2431	-	-	0.0187	3.0056	3.0056
13	13	Prediction	4.4	4.1599	-0.2401	-	-	0.0317	-0.3239	-0.3239
14	14	Training	6.2	6.1533	-0.0467	6.153	-0.047	0.0065	-0.0622	-0.0626
15	15	Training	5.6	6.2756	0.6756	6.2797	0.6797	0.006	0.8994	0.9049
16	16	Training	6.8	6.4833	-0.3167	6.4815	-0.3185	0.0056	-0.4215	-0.4239
17	17	Training	5.6	6.8671	1.2671	6.8746	1.2746	0.0059	1.6868	1.6968
18	18	Training	4	4.4661	0.4661	4.4784	0.4784	0.0256	0.6268	0.6432
19	19	Training	4.9	4.9583	0.0583	4.9594	0.0594	0.0174	0.0781	0.0795
20	20	Training	6	7.0544	1.0544	7.0613	1.0613	0.0064	1.4041	1.4132
21	21	Prediction	5.4	5.4248	0.0248	-	-	0.0117	0.0332	0.0332
22	22	Prediction	6.5	5.8871	-0.6129	-	-	0.0078	-0.8167	-0.8167
23	23	Training	7.6	6.6409	-0.9591	6.6355	-0.9645	0.0056	-1.2767	-1.2838
24	24	Prediction	6.4	6.1701	-0.2299	-	-	0.0064	-0.3061	-0.3061
25	25	Training	6.7	6.8834	0.1834	6.8845	0.1845	0.0059	0.2441	0.2456
26	26	Training	6.3	7.4084	1.1084	7.4177	1.1177	0.0084	1.4774	1.4899
27	27	Training	5.9	5.6009	-0.2991	5.5979	-0.3021	0.01	-0.399	-0.403
28	28	Training	5.7	6.4925	0.7925	6.497	0.797	0.0056	1.0549	1.0608
29	29	Training	5.2	5.3126	0.1126	5.3141	0.1141	0.0129	0.1505	0.1524
30	30	Training	5.6	6.854	1.254	6.8613	1.2613	0.0058	1.6693	1.6791
31	31	Training	6.9	6.895	-0.005	6.8949	-0.0051	0.0059	-0.0067	-0.0068
32	32	Training	6.3	6.5014	0.2014	6.5025	0.2025	0.0056	0.268	0.2696
33	33	Training	4.2	5.2821	1.0821	5.2966	1.0966	0.0132	1.4459	1.4653
34	34	Training	4.2	4.1549	-0.0451	4.1534	-0.0466	0.0318	-0.0608	-0.0628
35	35	Training	6.5	6.8097	0.3097	6.8115	0.3115	0.0057	0.4123	0.4146
36	36	Training	5.9	5.8858	-0.0142	5.8857	-0.0143	0.0078	-0.0189	-0.0191
37	37	Training	5.1	4.7682	-0.3318	4.7614	-0.3386	0.0203	-0.4449	-0.4541
38	38	Prediction	7.1	7.695	0.595	-	-	0.0107	0.794	0.794
39	39	Training	4.4	3.7017	-0.6983	3.6708	-0.7292	0.0424	-0.9472	-0.9891
40	40	Training	5.7	5.5495	-0.1505	5.5479	-0.1521	0.0104	-0.2008	-0.2029
41	41	Training	6.3	6.613	0.313	6.6148	0.3148	0.0056	0.4167	0.419
42	42	Training	5.5	6.4848	0.9848	6.4904	0.9904	0.0056	1.3109	1.3183
43	43	Training	6.2	6.3809	0.1809	6.382	0.182	0.0058	0.2409	0.2423
44	44	Prediction	6.2	6.225	0.025	-	-	0.0062	0.0333	0.0333
45	45	Training	7.4	7.1878	-0.2122	7.1863	-0.2137	0.007	-0.2827	-0.2847
46	46	Training	7.4	6.6608	-0.7392	6.6566	-0.7434	0.0056	-0.9839	-0.9894
47	47	Prediction	5.4	5.5169	0.1169	-	-	0.0107	0.156	0.156
48	48	Training	4.4	5.0737	0.6737	5.0846	0.6846	0.0158	0.9014	0.9159
49	49	Training	5.2	5.1682	-0.0318	5.1677	-0.0323	0.0146	-0.0425	-0.0432
50	50	Training	4.2	3.7492	-0.4508	3.7298	-0.4702	0.0412	-0.6111	-0.6373
51	51	Prediction	5.8	7.2122	1.4122	-	-	0.0072	1.8812	1.8812
52	52	Training	5.6	6.3873	0.7873	6.3919	0.7919	0.0058	1.0481	1.0542
53	53	Training	5.9	6.5169	0.6169	6.5204	0.6204	0.0056	0.8211	0.8257
54	54	Prediction	5.9	5.4767	-0.4233	-	-	0.0111	-0.565	-0.565
55	55	Training	6.6	6.5325	-0.0675	6.5321	-0.0679	0.0056	-0.0899	-0.0904
56	56	Training	6.2	6.726	0.526	6.729	0.529	0.0056	0.7001	0.7041
57	57	Training	5.5	5.6076	0.1076	5.6087	0.1087	0.0099	0.1435	0.1449
58	58	Training	6.7	6.6806	-0.0194	6.6805	-0.0195	0.0056	-0.0259	-0.026
59	59	Prediction	6.7	6.5728	-0.1272	-	-	0.0056	-0.1694	-0.1694
60	60	Training	5	4.9573	-0.0427	4.9566	-0.0434	0.0174	-0.0571	-0.0581
61	61	Training	7.6	7.2621	-0.3379	7.2596	-0.3404	0.0074	-0.4502	-0.4536
62	62	Prediction	5.9	6.4268	0.5268	-	-	0.0057	0.7012	0.7012
63	63	Training	5.5	6.9718	1.4718	6.9809	1.4809	0.0061	1.9597	1.9718
64	64	Training	6.3	6.5529	0.2529	6.5544	0.2544	0.0056	0.3367	0.3386
65	65	Training	6	5.8695	-0.1305	5.8685	-0.1315	0.0079	-0.1738	-0.1752
66	66	Training	7	6.7979	-0.2021	6.7968	-0.2032	0.0057	-0.269	-0.2705
67	67	Training	5.8	6.8179	1.0179	6.8238	1.0238	0.0058	1.355	1.3629
68	68	Prediction	6	6.5042	0.5042	-	-	0.0056	0.6711	0.6711
69	69	Training	6	6.7649	0.7649	6.7692	0.7692	0.0057	1.0181	1.0239
70	70	Training	6.5	6.8475	0.3475	6.8495	0.3495	0.0058	0.4626	0.4653
71	71	Training	5.8	6.1251	0.3251	6.1272	0.3272	0.0066	0.4329	0.4357
72	72	Training	5.6	6.7981	1.1981	6.8049	1.2049	0.0057	1.5948	1.604
73	73	Training	6	6.4173	0.4173	6.4197	0.4197	0.0057	0.5555	0.5587
74	74	Training	5.6	5.9588	0.3588	5.9615	0.3615	0.0074	0.4781	0.4816
75	75	Prediction	6.4	7.1599	0.7599	-	-	0.0069	1.0121	1.0121
76	76	Training	5.7	5.4901	-0.2099	5.4878	-0.2122	0.011	-0.2801	-0.2832
77	77	Prediction	4.9	4.8932	-0.0068	-	-	0.0184	-0.0092	-0.0092
78	78	Prediction	5.9	6.5576	0.6576	-	-	0.0056	0.8752	0.8752
79	79	Training	6.2	6.1441	-0.0559	6.1437	-0.0563	0.0065	-0.0745	-0.0749
80	80	Training	6.5	6.0476	-0.4524	6.0444	-0.4556	0.0069	-0.6026	-0.6068
81	81	Training	6.6	6.6072	0.0072	6.6073	0.0073	0.0056	0.0096	0.0097
82	82	Training	5.7	6.1383	0.4383	6.1412	0.4412	0.0065	0.5837	0.5875
83	83	Training	6.1	5.7146	-0.3854	5.7111	-0.3889	0.009	-0.5139	-0.5186
84	84	Training	6	6.6274	0.6274	6.6309	0.6309	0.0056	0.8351	0.8398
85	85	Training	5.3	4.8998	-0.4002	4.8924	-0.4076	0.0183	-0.5361	-0.5461
86	86	Training	6.7	6.3203	-0.3797	6.318	-0.382	0.0059	-0.5055	-0.5085
87	87	Training	6	5.7184	-0.2816	5.7159	-0.2841	0.009	-0.3754	-0.3788
88	88	Training	6.5	6.9098	0.4098	6.9123	0.4123	0.006	0.5456	0.5489
89	89	Training	5.5	5.9405	0.4405	5.9439	0.4439	0.0075	0.587	0.5914
90	90	Prediction	7.2	6.9947	-0.2053	-	-	0.0062	-0.2733	-0.2733
91	91	Training	6.1	6.5573	0.4573	6.5598	0.4598	0.0056	0.6087	0.6121
92	92	Training	6.8	7.1522	0.3522	7.1547	0.3547	0.0069	0.4691	0.4724
93	93	Training	6.1	6.9662	0.8662	6.9715	0.8715	0.0061	1.1533	1.1604
94	94	Training	6.1	6.0682	-0.0318	6.068	-0.032	0.0068	-0.0424	-0.0427
95	95	Training	6	6.7332	0.7332	6.7374	0.7374	0.0056	0.976	0.9815
96	96	Training	6.8	6.5164	-0.2836	6.5148	-0.2852	0.0056	-0.3775	-0.3796
97	97	Training	5.8	5.4484	-0.3516	5.4444	-0.3556	0.0114	-0.4693	-0.4747
98	98	Training	5.5	6.8919	1.3919	6.9002	1.4002	0.0059	1.853	1.864
99	99	Prediction	6	7.2058	1.2058	-	-	0.0071	1.6062	1.6062
100	100	Training	5.8	6.5291	0.7291	6.5332	0.7332	0.0056	0.9705	0.976
101	101	Prediction	5.5	5.3782	-0.1218	-	-	0.0121	-0.1627	-0.1627
102	102	Training	7.1	7.3954	0.2954	7.3979	0.2979	0.0083	0.3937	0.397
103	103	Training	5.5	6.177	0.677	6.1814	0.6814	0.0064	0.9015	0.9073
104	104	Training	4.5	4.6081	0.1081	4.6106	0.1106	0.023	0.1451	0.1486
105	105	Training	5.6	5.5996	-0.0004	5.5996	-0.0004	0.01	-0.0006	-0.0006
106	106	Training	5.6	6.1124	0.5124	6.1158	0.5158	0.0066	0.6824	0.687
107	107	Training	4.3	5.1389	0.8389	5.1517	0.8517	0.015	1.122	1.139
108	108	Training	5.3	6.0514	0.7514	6.0567	0.7567	0.0069	1.0009	1.0078
109	109	Prediction	6.9	5.9983	-0.9017	-	-	0.0072	-1.2012	-1.2012
110	110	Training	4.5	4.336	-0.164	4.3312	-0.1688	0.0281	-0.2208	-0.2272
111	111	Prediction	6.4	5.98	-0.42	-	-	0.0073	-0.5595	-0.5595
112	112	Prediction	6.6	6.8063	0.2063	-	-	0.0057	0.2746	0.2746
113	113	Training	6	6.0076	0.0076	6.0077	0.0077	0.0071	0.0101	0.0102
114	114	Prediction	5.6	6.3139	0.7139	-	-	0.0059	0.9504	0.9504
115	115	Training	5.3	5.1326	-0.1674	5.1301	-0.1699	0.015	-0.2239	-0.2273
116	116	Training	5.7	6.0015	0.3015	6.0037	0.3037	0.0072	0.4016	0.4045
117	117	Training	6.699	6.824	0.125	6.8247	0.1257	0.0058	0.1664	0.1673
118	118	Training	5.2	5.7194	0.5194	5.7241	0.5241	0.009	0.6925	0.6988
119	119	Training	5.8	6.1315	0.3315	6.1337	0.3337	0.0065	0.4415	0.4444
120	120	Training	6.7	7.439	0.739	7.4454	0.7454	0.0086	0.9852	0.9937
121	121	Training	5.3	6.341	1.041	6.3471	1.0471	0.0059	1.3858	1.3939
122	122	Training	7.9	6.326	-1.574	6.3167	-1.5833	0.0059	-2.0954	-2.1078
123	123	Training	5.4	6.289	0.889	6.2943	0.8943	0.006	1.1835	1.1907
124	124	Training	6.3	7.1221	0.8221	7.1276	0.8276	0.0067	1.0949	1.1023
125	125	Training	6.6	6.3839	-0.2161	6.3826	-0.2174	0.0058	-0.2877	-0.2894
126	126	Training	6.3	6.9477	0.6477	6.9516	0.6516	0.0061	0.8623	0.8676
127	127	Prediction	7.3	6.5327	-0.7673	-	-	0.0056	-1.0214	-1.0214
128	128	Prediction	5.6	6.2298	0.6298	-	-	0.0062	0.8386	0.8386
129	129	Training	4.3	5.2275	0.9275	5.2405	0.9405	0.0139	1.2397	1.2571
130	130	Training	6.8	7.3687	0.5687	7.3733	0.5733	0.0081	0.7579	0.764
131	131	Training	4.1	3.9493	-0.1507	3.9436	-0.1564	0.0364	-0.2037	-0.2114
132	132	Training	5.6	6.4516	0.8516	6.4564	0.8564	0.0057	1.1336	1.14
133	133	Training	6.7	5.4249	-1.2751	5.4099	-1.2901	0.0117	-1.7024	-1.7224
134	134	Training	5.7	5.306	-0.394	5.3008	-0.3992	0.0129	-0.5264	-0.5333
135	135	Training	5.9	7.2295	1.3295	7.2392	1.3392	0.0073	1.7711	1.7841
136	136	Training	6.8	6.6895	-0.1105	6.6889	-0.1111	0.0056	-0.147	-0.1479
137	137	Training	5.3	4.902	-0.398	4.8946	-0.4054	0.0182	-0.5332	-0.5431
138	138	Prediction	6.2	7.1397	0.9397	-	-	0.0068	1.2515	1.2515
139	139	Training	6.1	5.5712	-0.5288	5.5658	-0.5342	0.0102	-0.7055	-0.7128
140	140	Prediction	5.5	5.7579	0.2579	-	-	0.0087	0.3438	0.3438
141	141	Training	6.9	6.9971	0.0971	6.9977	0.0977	0.0062	0.1292	0.13
142	142	Training	6.6	7.4192	0.8192	7.4261	0.8261	0.0084	1.0919	1.1012
143	143	Training	5.5	5.7989	0.2989	5.8015	0.3015	0.0084	0.3984	0.4018
144	144	Training	6.9	6.3859	-0.5141	6.3829	-0.5171	0.0058	-0.6843	-0.6883
145	145	Prediction	6.7	6.0768	-0.6232	-	-	0.0068	-0.8301	-0.8301
146	146	Training	6.7	6.4182	-0.2818	6.4165	-0.2835	0.0057	-0.3752	-0.3773
147	147	Training	4.1	3.945	-0.155	3.9391	-0.1609	0.0365	-0.2096	-0.2176
148	148	Training	6.9	6.6277	-0.2723	6.6262	-0.2738	0.0056	-0.3624	-0.3645
149	149	Training	5.4	4.864	-0.536	4.8537	-0.5463	0.0188	-0.7183	-0.7321
150	150	Training	6.8	6.5442	-0.2558	6.5428	-0.2572	0.0056	-0.3404	-0.3423
151	151	Training	5.8	6.2231	0.4231	6.2257	0.4257	0.0062	0.5634	0.5669
152	152	Training	5.8	5.7652	-0.0348	5.7649	-0.0351	0.0086	-0.0463	-0.0467
153	153	Training	5.8	5.6819	-0.1181	5.6808	-0.1192	0.0093	-0.1575	-0.159
154	154	Prediction	5	5.3768	0.3768	-	-	0.0122	0.5032	0.5032
155	155	Training	8.959	7.6813	-1.2777	7.6676	-1.2914	0.0106	-1.7051	-1.7233
156	156	Training	8.553	6.749	-1.804	6.7387	-1.8143	0.0056	-2.4014	-2.415
157	157	Training	8.125	6.7895	-1.3355	6.7818	-1.3432	0.0057	-1.7777	-1.7879
158	158	Training	8.886	7.301	-1.585	7.2888	-1.5972	0.0077	-2.1119	-2.1282
159	159	Training	7.824	7.3899	-0.4341	7.3863	-0.4377	0.0082	-0.5785	-0.5833
160	160	Training	8.215	7.7452	-0.4698	7.7399	-0.4751	0.0112	-0.627	-0.6342
161	161	Prediction	9.398	7.6529	-1.7451	-	-	0.0103	-2.3284	-2.3284
162	162	Training	8.301	7.0099	-1.2911	7.0017	-1.2993	0.0063	-1.7192	-1.73
163	163	Training	7.796	6.571	-1.225	6.5641	-1.2319	0.0056	-1.6306	-1.6397
164	164	Training	7.959	6.7239	-1.2351	6.7169	-1.2421	0.0056	-1.644	-1.6533
165	165	Training	8.699	6.5523	-2.1467	6.5403	-2.1587	0.0056	-2.8573	-2.8733
166	166	Training	8.585	7.1805	-1.4045	7.1706	-1.4144	0.007	-1.8708	-1.884
167	167	Prediction	8.585	7.4033	-1.1817	-	-	0.0083	-1.575	-1.575
168	168	Prediction	6.7	6.4428	-0.2572	-	-	0.0057	-0.3424	-0.3424
169	169	Training	8.398	6.5377	-1.8603	6.5273	-1.8707	0.0056	-2.4761	-2.49
170	170	Training	8.086	6.9159	-1.1701	6.9089	-1.1771	0.006	-1.5578	-1.5671
171	171	Training	8.796	6.9915	-1.8045	6.9802	-1.8158	0.0062	-2.4027	-2.4177
172	172	Training	9.658	7.827	-1.831	7.8047	-1.8533	0.0121	-2.4451	-2.4749
173	173	Training	9.42	7.5495	-1.8705	7.5317	-1.8883	0.0094	-2.4946	-2.5184
174	174	Prediction	9.244	7.3743	-1.8697	-	-	0.0081	-2.4919	-2.4919
175	175	Prediction	9.208	8.1592	-1.0488	-	-	0.0161	-1.4035	-1.4035
176	176	Training	9.538	8.4676	-1.0704	8.445	-1.093	0.0207	-1.4357	-1.466
177	177	Training	8.721	7.9552	-0.7658	7.9447	-0.7763	0.0135	-1.0234	-1.0374
178	178	Training	10	8.1932	-1.8068	8.1628	-1.8372	0.0166	-2.4183	-2.459
179	179	Training	9.155	8.0461	-1.1089	8.0297	-1.1253	0.0146	-1.4827	-1.5047
180	180	Training	8.699	8.0871	-0.6119	8.0777	-0.6213	0.0151	-0.8184	-0.8309
181	181	Training	9.252	7.8544	-1.3976	7.8369	-1.4151	0.0124	-1.8667	-1.89
182	182	Training	7.022	7.2589	0.2369	7.2607	0.2387	0.0074	0.3157	0.318
183	183	Training	6.301	6.7794	0.4784	6.7821	0.4811	0.0057	0.6367	0.6404
184	184	Training	5.5	6.4386	0.9386	6.444	0.944	0.0057	1.2494	1.2566
185	185	Training	5.959	6.879	0.92	6.8845	0.9255	0.0059	1.2248	1.232
186	186	Training	6	5.974	-0.026	5.9738	-0.0262	0.0073	-0.0347	-0.0349
187	187	Prediction	9	8.9519	-0.0481	-	-	0.0296	-0.0648	-0.0648
188	188	Training	7.102	7.2043	0.1023	7.205	0.103	0.0071	0.1362	0.1372
189	189	Training	8.398	8.9378	0.5398	8.9541	0.5561	0.0293	0.7272	0.7491
190	190	Training	8.301	9.1715	0.8705	9.2024	0.9014	0.0343	1.1757	1.2175
191	191	Training	8.398	9.2517	0.8537	9.2837	0.8857	0.0361	1.1542	1.1974
192	192	Training	9	8.893	-0.107	8.8899	-0.1101	0.0284	-0.1441	-0.1483
193	193	Prediction	8.699	9.1082	0.4092	-	-	0.0329	0.5524	0.5524
194	194	Training	7.745	7.644	-0.101	7.6429	-0.1021	0.0103	-0.1348	-0.1362
195	195	Training	8.699	8.8512	0.1522	8.8555	0.1565	0.0276	0.2048	0.2106
196	196	Training	8.097	7.2304	-0.8666	7.2241	-0.8729	0.0073	-1.1545	-1.1629
197	197	Training	9	9.0709	0.0709	9.0733	0.0733	0.0321	0.0957	0.0988
198	198	Prediction	8.398	8.8545	0.4565	-	-	0.0276	0.6145	0.6145
199	199	Training	8.824	8.9019	0.0779	8.9042	0.0802	0.0286	0.105	0.1081
200	200	Training	8.699	8.9529	0.2539	8.9606	0.2616	0.0296	0.3421	0.3525
201	201	Prediction	8.301	8.9986	0.6976	-	-	0.0305	0.9404	0.9404
202	202	Training	9	8.587	-0.413	8.5774	-0.4226	0.0227	-0.5546	-0.5674
203	203	Training	7.886	8.4214	0.5354	8.4323	0.5463	0.0199	0.7178	0.7324
204	204	Prediction	8.222	7.5161	-0.7059	-	-	0.0092	-0.9413	-0.9413
205	205	Prediction	8.097	9.3454	1.2484	-	-	0.0383	1.6897	1.6897
206	206	Prediction	9	8.5152	-0.4848	-	-	0.0215	-0.6505	-0.6505
207	207	Training	8.699	8.8818	0.1828	8.8871	0.1881	0.0282	0.2461	0.2533
208	208	Training	9	9.0578	0.0578	9.0597	0.0597	0.0318	0.0779	0.0805
209	209	Training	7.959	8.8138	0.8548	8.8373	0.8783	0.0268	1.1501	1.1818
210	210	Training	7.824	8.5071	0.6831	8.5219	0.6979	0.0213	0.9165	0.9364
211	211	Training	8.523	8.5305	0.0075	8.5307	0.0077	0.0217	0.01	0.0103
212	212	Training	5.9	6.4177	0.5177	6.4207	0.5207	0.0057	0.6891	0.6931
213	213	Training	8.4	6.4597	-1.9403	6.4487	-1.9513	0.0056	-2.5827	-2.5974
214	214	Training	8.398	8.0775	-0.3205	8.0726	-0.3254	0.015	-0.4286	-0.4352
215	215	Training	6.2	7.1754	0.9754	7.1822	0.9822	0.007	1.2992	1.3083
216	216	Training	9.538	8.5906	-0.9474	8.5685	-0.9695	0.0227	-1.2721	-1.3017
217	217	Training	6.222	6.6021	0.3801	6.6042	0.3822	0.0056	0.5059	0.5087
218	218	Training	9.155	8.7917	-0.3633	8.7818	-0.3732	0.0264	-0.4888	-0.502
219	219	Prediction	5.1	4.8084	-0.2916	-	-	0.0197	-0.3909	-0.3909
220	220	Training	6.2	6.5381	0.3381	6.54	0.34	0.0056	0.45	0.4525
221	221	Training	5.8	5.0446	-0.7554	5.0321	-0.7679	0.0162	-1.0109	-1.0276
222	222	Training	5.8	6.0365	0.2365	6.0382	0.2382	0.007	0.3151	0.3173
223	223	Training	5.8	6.3599	0.5599	6.3632	0.5632	0.0058	0.7454	0.7497
224	224	Training	5.6	5.9096	0.3096	5.912	0.312	0.0077	0.4125	0.4157
