# Supplementary material for: QSAR, Molecular Docking, MD Simulation and MMGBSA Calculations Approaches to Recognize Concealed Pharmacophoric Features Requisite for the Optimization of ALK Tyrosine Kinase Inhibitors as Anticancer Leads
Source: Molecules. 2022 Aug 3;27(15):4951. doi: 10.3390/molecules27154951 (PMC9370430; doi:10.3390/molecules27154951)
Supplement: Supplementary file 1 [file molecules-27-04951-s001.zip › Table S4.xlsx]

## Sheet: Sheet1
Table S4: Details regarding performance of Multivariate divided set model comprising Different graphs associated with model 1.2. Statistical parameters for used for validation of QSAR models
	Variable	Coeff.	Std. coeff.	Std. err.	(+/-) Co. int. 95%	p-value
	Intercept	-6.7137		0.555	1.0953	0
	rsa	21.6813	0.7564	1.0741	2.1198	0
	notringO_F_5B	1.0848	0.3668	0.0853	0.1683	0
	N_plaN_4B	0.0674	0.1079	0.0197	0.0388	0.0008
	ringC_lipo_2B	-0.0359	-0.1196	0.0101	0.0199	0.0005
	(Fitting criteria)
	R2: 0.8697		R2adj: 0.8668		R2-R2adj: 0.0030		LOF: 0.2562
	Kxx: 0.2944		Delta K: 0.1409		RMSE tr: 0.4837		MAE tr: 0.3879
	RSS tr: 42.1060		CCC tr: 0.9303		s: 0.4905		F: 292.1150
	(Internal validation criteria)
	Q2loo: 0.8618		R2-Q2loo: 0.0079		RMSE cv: 0.4982		MAE cv: 0.3992
	PRESS cv: 44.6715		CCC cv: 0.9262
	Q2LMO: 0.8600		R2Yscr: 0.0224		Q2Yscr: -0.0346		RMSE AV Yscr: 1.3249
	R2Xrnd:		Q2Xrnd:		R2Yrnd:		Q2Yrnd:
	(External validation criteria)
	RMSE ext: 0.5714		MAE ext: 0.4580		PRESS ext: 14.3654		R2ext: 0.8301
	Q2-F1: 0.8297		Q2-F2: 0.8292		Q2-F3: 0.8182		CCC ext: 0.9072
	r2m aver.: 0.7537		r2m delta: 0.1517
	Calc. external data regr. angle from diagonal: -5.1517°
	Predictions by LOO:
	Exp(x) vs. Pred(y): R2: 0.8618	R'2o: 0.8422	k': 0.9949	Clos': 0.0227	r'2m: 0.7412
	Pred(x) vs. Exp(y): R2: 0.8618	R2o: 0.8618	k: 0.9997	Clos: 0.0000	r2m: 0.8574
	External predictions by model equation:
	Exp(x) vs. Pred(y): R2: 0.8301	R'2o: 0.7965	k': 0.9991	Clos': 0.0405	r'2m: 0.6779
	Pred(x) vs. Exp(y): R2: 0.8301	R2o: 0.8301	k: 0.9939	Clos: 0.0000	r2m: 0.8296
	ID	Name	Status	Exp. endpoint	Pred. by model eq.	Pred.Mod.Eq.Res.	Pred. LOO	Pred. LOO Res.	HAT i/i (h*=0.0833)	Std.Pred.Mod.Eq. Res.	Std.Pred.LOO Res.
	1	1	Training	6	6.314	0.314	6.316	0.316	0.0066	0.6422	0.6464
	2	2	Prediction	6.2	6.1611	-0.0389	-	-	0.0297	-0.0804	-0.0804
	3	3	Prediction	6.7	7.0233	0.3233	-	-	0.0129	0.6633	0.6633
	4	4	Training	7.3	7.1713	-0.1287	7.1696	-0.1304	0.0135	-0.2641	-0.2677
	5	5	Prediction	7	7.2331	0.2331	-	-	0.0139	0.4786	0.4786
	6	6	Prediction	7	6.7013	-0.2987	-	-	0.016	-0.6139	-0.6139
	7	7	Training	6.7	6.5641	-0.1359	6.5609	-0.1391	0.0233	-0.2802	-0.2869
	8	8	Training	5.6	5.0786	-0.5214	5.0622	-0.5378	0.0306	-1.0795	-1.1136
	9	9	Training	6.1	5.4715	-0.6285	5.461	-0.639	0.0163	-1.292	-1.3134
	10	10	Prediction	6.77	6.5772	-0.1928	-	-	0.039	-0.401	-0.401
	11	11	Training	6.3	5.5559	-0.7441	5.5329	-0.7671	0.03	-1.5402	-1.5878
	12	12	Training	6.1	7.3699	1.2699	7.4508	1.3508	0.0599	2.6702	2.8403
	13	13	Training	4.4	4.3284	-0.0716	4.3249	-0.0751	0.0464	-0.1495	-0.1568
	14	14	Training	6.2	5.8945	-0.3055	5.8917	-0.3083	0.009	-0.6256	-0.6313
	15	15	Prediction	5.6	5.8611	0.2611	-	-	0.0145	0.5361	0.5361
	16	16	Training	6.8	6.108	-0.692	6.1	-0.7	0.0114	-1.4189	-1.4354
	17	17	Training	5.6	6.3994	0.7994	6.4164	0.8164	0.0209	1.6469	1.6821
	18	18	Training	4	4.7233	0.7233	4.743	0.743	0.0264	1.4945	1.535
	19	19	Training	4.9	4.9737	0.0737	4.975	0.075	0.0175	0.1516	0.1543
	20	20	Prediction	6	6.6286	0.6286	-	-	0.0231	1.2967	1.2967
	21	21	Training	5.4	5.3411	-0.0589	5.3403	-0.0597	0.0132	-0.1209	-0.1225
	22	22	Training	6.5	5.6959	-0.8041	5.6829	-0.8171	0.0159	-1.6526	-1.6793
	23	23	Prediction	7.6	7.0821	-0.5179	-	-	0.0649	-1.0919	-1.0919
	24	24	Prediction	6.4	6.0842	-0.3158	-	-	0.0074	-0.6463	-0.6463
	25	25	Training	6.7	6.4808	-0.2192	6.4752	-0.2248	0.0249	-0.4526	-0.4641
	26	26	Training	6.3	6.975	0.675	6.9826	0.6826	0.0111	1.3838	1.3994
	27	27	Training	5.9	5.3541	-0.5459	5.3449	-0.5551	0.0167	-1.1222	-1.1413
	28	28	Training	5.7	6.0755	0.3755	6.0852	0.3852	0.0252	0.7754	0.7954
	29	29	Training	5.2	5.2441	0.0441	5.2447	0.0447	0.0139	0.0905	0.0918
	30	30	Training	5.6	6.3296	0.7296	6.345	0.745	0.0206	1.503	1.5347
	31	31	Prediction	6.9	6.2258	-0.6742	-	-	0.0324	-1.3972	-1.3972
	32	32	Training	6.3	6.4334	0.1334	6.4354	0.1354	0.015	0.274	0.2782
	33	33	Prediction	4.2	5.2851	1.0851	-	-	0.0128	2.2264	2.2264
	34	34	Prediction	4.2	4.3241	0.1241	-	-	0.0464	0.259	0.259
	35	35	Training	6.5	7.4346	0.9346	7.4812	0.9812	0.0475	1.9522	2.0496
	36	36	Prediction	5.9	5.6318	-0.2682	-	-	0.0112	-0.5498	-0.5498
	37	37	Prediction	5.1	4.98	-0.12	-	-	0.0225	-0.2474	-0.2474
	38	38	Training	7.1	7.2452	0.1452	7.2519	0.1519	0.0438	0.3028	0.3167
	39	39	Training	4.4	4.2062	-0.1938	4.1962	-0.2038	0.0491	-0.4052	-0.4261
	40	40	Training	5.7	5.9023	0.2023	5.9093	0.2093	0.0332	0.4195	0.4339
	41	41	Training	6.3	6.0091	-0.2909	6.0007	-0.2993	0.028	-0.6015	-0.6189
	42	42	Training	5.5	6.0778	0.5778	6.0849	0.5849	0.0121	1.1852	1.1998
	43	43	Training	6.2	5.9162	-0.2838	5.9113	-0.2887	0.0169	-0.5835	-0.5935
	44	44	Training	6.2	6.1271	-0.0729	6.1263	-0.0737	0.0112	-0.1494	-0.1511
	45	45	Prediction	7.4	6.8517	-0.5483	-	-	0.0119	-1.1246	-1.1246
	46	46	Training	7.4	6.7059	-0.6941	6.6814	-0.7186	0.034	-1.4398	-1.4905
	47	47	Training	5.4	5.7349	0.3349	5.7425	0.3425	0.0221	0.6904	0.7061
	48	48	Training	4.4	5.1768	0.7768	5.1895	0.7895	0.0161	1.5965	1.6226
	49	49	Training	5.2	5.1237	-0.0763	5.122	-0.078	0.0222	-0.1573	-0.1609
	50	50	Training	4.2	4.0452	-0.1548	4.0356	-0.1644	0.0581	-0.3252	-0.3453
	51	51	Training	5.8	6.9221	1.1221	6.9601	1.1601	0.0328	2.326	2.405
	52	52	Prediction	5.6	6.1642	0.5642	-	-	0.0082	1.1549	1.1549
	53	53	Training	5.9	6.4602	0.5602	6.473	0.573	0.0224	1.155	1.1815
	54	54	Training	5.9	5.799	-0.101	5.7962	-0.1038	0.0269	-0.2088	-0.2146
	55	55	Training	6.6	6.3615	-0.2385	6.3599	-0.2401	0.0066	-0.4879	-0.4912
	56	56	Training	6.2	6.2504	0.0504	6.2511	0.0511	0.0139	0.1035	0.1049
	57	57	Prediction	5.5	5.5979	0.0979	-	-	0.0112	0.2006	0.2006
	58	58	Training	6.7	6.2381	-0.4619	6.2274	-0.4726	0.0228	-0.9526	-0.9747
	59	59	Training	6.7	5.9069	-0.7931	5.8804	-0.8196	0.0324	-1.6436	-1.6987
	60	60	Training	5	5.2468	0.2468	5.2531	0.2531	0.025	0.5095	0.5226
	61	61	Training	7.6	7.0551	-0.5449	7.0476	-0.5524	0.0134	-1.1185	-1.1338
	62	62	Training	5.9	6.3374	0.4374	6.3414	0.4414	0.0089	0.8958	0.9039
	63	63	Training	5.5	6.4719	0.9719	6.5108	1.0108	0.0385	2.0206	2.1014
	64	64	Training	6.3	6.1278	-0.1722	6.1235	-0.1765	0.0243	-0.3554	-0.3643
	65	65	Training	6	6.1386	0.1386	6.142	0.142	0.0244	0.286	0.2932
	66	66	Training	7	6.5191	-0.4809	6.5156	-0.4844	0.0072	-0.9839	-0.9911
	67	67	Prediction	5.8	6.6441	0.8441	-	-	0.0089	1.7286	1.7286
	68	68	Training	6	6.5705	0.5705	6.5919	0.5919	0.0361	1.1847	1.2291
	69	69	Training	6	6.8722	0.8722	6.8924	0.8924	0.0226	1.7985	1.8401
	70	70	Training	6.5	6.4498	-0.0502	6.4485	-0.0515	0.0253	-0.1037	-0.1064
	71	71	Prediction	5.8	5.8701	0.0701	-	-	0.0091	0.1436	0.1436
	72	72	Training	5.6	6.0972	0.4972	6.117	0.517	0.0382	1.0337	1.0748
	73	73	Training	6	6.0195	0.0195	6.0197	0.0197	0.0121	0.04	0.0404
	74	74	Training	5.6	5.5243	-0.0757	5.5224	-0.0776	0.025	-0.1562	-0.1602
	75	75	Training	6.4	6.41	0.01	6.4104	0.0104	0.0359	0.0208	0.0216
	76	76	Training	5.7	5.2224	-0.4776	5.2137	-0.4863	0.018	-0.9825	-1.0005
	77	77	Training	4.9	5.088	0.188	5.0919	0.1919	0.0204	0.3873	0.3953
	78	78	Training	5.9	5.9253	0.0253	5.9261	0.0261	0.0343	0.0524	0.0542
	79	79	Training	6.2	6.0795	-0.1205	6.0699	-0.1301	0.0738	-0.2552	-0.2756
	80	80	Training	6.5	5.8705	-0.6295	5.8635	-0.6365	0.0109	-1.2905	-1.3048
	81	81	Training	6.6	7.2595	0.6595	7.2952	0.6952	0.0513	1.3804	1.4551
	82	82	Training	5.7	5.7783	0.0783	5.7793	0.0793	0.0129	0.1607	0.1628
	83	83	Training	6.1	5.7981	-0.3019	5.7943	-0.3057	0.0125	-0.6193	-0.6272
	84	84	Training	6	6.3628	0.3628	6.3743	0.3743	0.0307	0.7512	0.775
	85	85	Training	5.3	5.1656	-0.1344	5.1625	-0.1375	0.0226	-0.2772	-0.2836
	86	86	Prediction	6.7	6.178	-0.522	-	-	0.0068	-1.0678	-1.0678
	87	87	Training	6	5.5993	-0.4007	5.5897	-0.4103	0.0235	-0.8266	-0.8465
	88	88	Training	6.5	6.755	0.255	6.7573	0.2573	0.0087	0.5222	0.5268
	89	89	Prediction	5.5	5.8228	0.3228	-	-	0.0147	0.663	0.663
	90	90	Training	7.2	6.5097	-0.6903	6.4956	-0.7044	0.0199	-1.4216	-1.4505
	91	91	Training	6.1	6.1405	0.0405	6.141	0.041	0.0122	0.083	0.084
	92	92	Training	6.8	6.7132	-0.0868	6.7112	-0.0888	0.0223	-0.179	-0.1831
	93	93	Training	6.1	6.3325	0.2325	6.359	0.259	0.1025	0.5002	0.5573
	94	94	Prediction	6.1	5.6907	-0.4093	-	-	0.0261	-0.8455	-0.8455
	95	95	Training	6	6.324	0.324	6.3275	0.3275	0.0107	0.6641	0.6712
	96	96	Prediction	6.8	6.0692	-0.7308	-	-	0.0138	-1.5002	-1.5002
	97	97	Training	5.8	5.7745	-0.0255	5.7738	-0.0262	0.0272	-0.0526	-0.0541
	98	98	Prediction	5.5	6.0033	0.5033	-	-	0.063	1.06	1.06
	99	99	Prediction	6	7.0153	1.0153	-	-	0.0159	2.0865	2.0865
	100	100	Training	5.8	6.4259	0.6259	6.4313	0.6313	0.0086	1.2816	1.2927
	101	101	Training	5.5	5.2738	-0.2262	5.2656	-0.2344	0.0348	-0.4695	-0.4864
	102	102	Training	7.1	7.067	-0.033	7.0667	-0.0333	0.0109	-0.0675	-0.0683
	103	103	Training	5.5	5.713	0.213	5.7186	0.2186	0.0256	0.4399	0.4514
	104	104	Training	4.5	4.9852	0.4852	5.0009	0.5009	0.0312	1.005	1.0374
	105	105	Training	5.6	5.5909	-0.0091	5.5908	-0.0092	0.0113	-0.0186	-0.0188
	106	106	Training	5.6	5.8547	0.2547	5.8589	0.2589	0.0163	0.5236	0.5323
	107	107	Training	4.3	5.269	0.969	5.286	0.986	0.0172	1.9927	2.0277
	108	108	Training	5.3	6.0578	0.7578	6.0713	0.7713	0.0174	1.5586	1.5862
	109	109	Training	6.9	6.3172	-0.5828	6.2983	-0.6017	0.0314	-1.2072	-1.2464
	110	110	Training	4.5	4.7141	0.2141	4.7214	0.2214	0.0329	0.4438	0.4589
	111	111	Training	6.4	5.9198	-0.4802	5.9159	-0.4841	0.0081	-0.9829	-0.991
	112	112	Training	6.6	6.3198	-0.2802	6.3158	-0.2842	0.0141	-0.5753	-0.5835
	113	113	Training	6	6.7142	0.7142	6.7489	0.7489	0.0463	1.491	1.5634
	114	114	Training	5.6	5.9301	0.3301	5.9342	0.3342	0.0123	0.677	0.6855
	115	115	Training	5.3	5.2277	-0.0723	5.2265	-0.0735	0.0155	-0.1486	-0.151
	116	116	Training	5.7	5.6331	-0.0669	5.6313	-0.0687	0.0257	-0.1383	-0.1419
	117	117	Training	6.699	6.2722	-0.4268	6.2583	-0.4407	0.0316	-0.8841	-0.9129
	118	118	Training	5.2	5.4206	0.2206	5.4244	0.2244	0.0167	0.4536	0.4613
	119	119	Training	5.8	5.8083	0.0083	5.8084	0.0084	0.0113	0.0171	0.0173
	120	120	Prediction	6.7	6.8578	0.1578	-	-	0.0225	0.3255	0.3255
	121	121	Training	5.3	6.0882	0.7882	6.0966	0.7966	0.0106	1.6154	1.6327
	122	122	Training	7.9	7.1287	-0.7713	7.1029	-0.7971	0.0323	-1.5985	-1.6519
	123	123	Prediction	5.4	6.0791	0.6791	-	-	0.0088	1.3907	1.3907
	124	124	Training	6.3	6.5928	0.2928	6.5975	0.2975	0.0159	0.6017	0.6114
	125	125	Training	6.6	6.5428	-0.0572	6.5414	-0.0586	0.0234	-0.118	-0.1208
	126	126	Training	6.3	6.9224	0.6224	6.935	0.635	0.0198	1.2817	1.3075
	127	127	Prediction	7.3	6.429	-0.871	-	-	0.0086	-1.7834	-1.7834
	128	128	Training	5.6	6.45	0.85	6.4711	0.8711	0.0242	1.7542	1.7977
	129	129	Prediction	4.3	5.1705	0.8705	-	-	0.0146	1.7877	1.7877
	130	130	Prediction	6.8	6.9003	0.1003	-	-	0.021	0.2066	0.2066
	131	131	Training	4.1	4.2811	0.1811	4.2884	0.1884	0.0387	0.3765	0.3916
	132	132	Training	5.6	6.3948	0.7948	6.402	0.802	0.009	1.6277	1.6424
	133	133	Training	6.7	5.3097	-1.3903	5.2817	-1.4183	0.0198	-2.8628	-2.9206
	134	134	Training	5.7	5.5122	-0.1878	5.5086	-0.1914	0.0192	-0.3865	-0.3941
	135	135	Training	5.9	6.7126	0.8126	6.7282	0.8282	0.0188	1.6724	1.7044
	136	136	Training	6.8	6.0483	-0.7517	6.0243	-0.7757	0.0309	-1.5568	-1.6063
	137	137	Training	5.3	5.0283	-0.2717	5.0233	-0.2767	0.018	-0.5589	-0.5692
	138	138	Training	6.2	6.608	0.408	6.6146	0.4146	0.016	0.8385	0.8522
	139	139	Training	6.1	5.773	-0.327	5.7655	-0.3345	0.0224	-0.6743	-0.6898
	140	140	Training	5.5	5.7278	0.2278	5.73	0.23	0.0097	0.4667	0.4712
	141	141	Training	6.9	6.7227	-0.1773	6.7209	-0.1791	0.0103	-0.3633	-0.3671
	142	142	Training	6.6	7.0876	0.4876	7.093	0.493	0.011	0.9995	1.0106
	143	143	Prediction	5.5	6.0775	0.5775	-	-	0.0247	1.1922	1.1922
	144	144	Training	6.9	6.5849	-0.3151	6.577	-0.323	0.0247	-0.6504	-0.6668
	145	145	Training	6.7	6.1785	-0.5215	6.1712	-0.5288	0.0138	-1.0706	-1.0856
	146	146	Training	6.7	6.1683	-0.5317	6.1534	-0.5466	0.0273	-1.099	-1.1299
	147	147	Training	4.1	4.4165	0.3165	4.4314	0.3314	0.0451	0.6602	0.6914
	148	148	Training	6.9	6.7895	-0.1105	6.7867	-0.1133	0.0248	-0.2282	-0.2339
	149	149	Training	5.4	5.166	-0.234	5.1596	-0.2404	0.0266	-0.4834	-0.4966
	150	150	Training	6.8	6.2728	-0.5272	6.2653	-0.5347	0.0142	-1.0824	-1.0979
	151	151	Training	5.8	5.883	0.083	5.8842	0.0842	0.0132	0.1704	0.1727
	152	152	Prediction	5.8	5.7656	-0.0344	-	-	0.0149	-0.0707	-0.0707
	153	153	Prediction	5.8	5.725	-0.075	-	-	0.0269	-0.155	-0.155
	154	154	Training	5	5.6453	0.6453	5.6596	0.6596	0.0218	1.3301	1.3597
	155	155	Prediction	8.959	8.5426	-0.4164	-	-	0.0269	-0.8606	-0.8606
	156	156	Training	8.553	7.9387	-0.6143	7.9104	-0.6426	0.0441	-1.2809	-1.34
	157	157	Training	8.125	7.9064	-0.2186	7.8988	-0.2262	0.034	-0.4533	-0.4693
	158	158	Prediction	8.886	8.1421	-0.7439	-	-	0.024	-1.5352	-1.5352
	159	159	Training	7.824	8.2908	0.4668	8.3026	0.4786	0.0248	0.9636	0.9881
	160	160	Training	8.215	8.5261	0.3111	8.5342	0.3192	0.0253	0.6424	0.6591
	161	161	Prediction	9.398	8.5181	-0.8799	-	-	0.0266	-1.8182	-1.8182
	162	162	Training	8.301	7.7827	-0.5183	7.7654	-0.5356	0.0323	-1.0742	-1.11
	163	163	Training	7.796	7.5155	-0.2805	7.5082	-0.2878	0.0252	-0.5793	-0.5942
	164	164	Training	7.959	7.6476	-0.3114	7.6398	-0.3192	0.0247	-0.6427	-0.659
	165	165	Training	8.699	8.5842	-0.1148	8.5709	-0.1281	0.1034	-0.2473	-0.2758
	166	166	Training	8.585	8.2444	-0.3406	8.2335	-0.3515	0.031	-0.7053	-0.7279
	167	167	Training	8.585	8.4371	-0.1479	8.4324	-0.1526	0.0303	-0.3063	-0.3158
	168	168	Training	6.7	6.2121	-0.4879	6.2082	-0.4918	0.0079	-0.9986	-1.0066
	169	169	Training	8.398	8.6748	0.2768	8.7063	0.3083	0.1022	0.5956	0.6634
	170	170	Training	8.086	7.7822	-0.3038	7.7728	-0.3132	0.03	-0.6288	-0.6482
	171	171	Prediction	8.796	9.0311	0.2351	-	-	0.0981	0.5048	0.5048
	172	172	Training	9.658	9.7534	0.0954	9.7636	0.1056	0.0961	0.2047	0.2264
	173	173	Training	9.42	9.4462	0.0262	9.449	0.029	0.0989	0.0562	0.0624
	174	174	Prediction	9.244	9.3621	0.1181	-	-	0.0958	0.2531	0.2531
	175	175	Training	9.208	10.0406	0.8326	10.1313	0.9233	0.0983	1.7874	1.9822
	176	176	Training	9.538	9.2223	-0.3157	9.2095	-0.3285	0.0391	-0.6565	-0.6832
	177	177	Training	8.721	8.7794	0.0584	8.7812	0.0602	0.0301	0.1209	0.1246
	178	178	Training	10	9.1603	-0.8397	9.1222	-0.8778	0.0434	-1.7503	-1.8297
	179	179	Training	9.155	8.9253	-0.2297	8.9181	-0.2369	0.0304	-0.4755	-0.4904
	180	180	Training	8.699	8.889	0.19	8.8945	0.1955	0.0281	0.3929	0.4043
	181	181	Training	9.252	8.9347	-0.3173	8.9219	-0.3301	0.0388	-0.6598	-0.6865
	182	182	Training	7.022	6.9625	-0.0595	6.9604	-0.0616	0.034	-0.1235	-0.1278
	183	183	Prediction	6.301	6.2336	-0.0674	-	-	0.0309	-0.1395	-0.1395
	184	184	Training	5.5	5.8987	0.3987	5.9076	0.4076	0.0216	0.8218	0.84
	185	185	Training	5.959	6.3198	0.3608	6.3319	0.3729	0.0324	0.7477	0.7727
	186	186	Training	6	5.9101	-0.0899	5.9088	-0.0912	0.014	-0.1845	-0.1872
	187	187	Training	9	8.3408	-0.6592	8.3181	-0.6819	0.0332	-1.3669	-1.4138
	188	188	Training	7.102	7.2834	0.1814	7.2891	0.1871	0.0305	0.3756	0.3874
	189	189	Training	8.398	8.4362	0.0382	8.4378	0.0398	0.0387	0.0795	0.0827
	190	190	Training	8.301	8.6742	0.3732	8.6939	0.3929	0.0503	0.7806	0.8219
	191	191	Prediction	8.398	9.9272	1.5292	-	-	0.0452	3.1904	3.1904
	192	192	Training	9	8.3975	-0.6025	8.3741	-0.6259	0.0374	-1.2519	-1.3004
	193	193	Training	8.699	8.4714	-0.2276	8.4627	-0.2363	0.0368	-0.4728	-0.4908
	194	194	Training	7.745	7.4166	-0.3284	7.4094	-0.3356	0.0216	-0.6768	-0.6917
	195	195	Training	8.699	8.3614	-0.3376	8.3487	-0.3503	0.0361	-0.7011	-0.7274
	196	196	Training	8.097	6.884	-1.213	6.855	-1.242	0.0234	-2.5023	-2.5621
	197	197	Training	9	8.5872	-0.4128	8.567	-0.433	0.0467	-0.8619	-0.9041
	198	198	Training	8.398	8.4002	0.0022	8.4003	0.0023	0.0397	0.0045	0.0047
	199	199	Training	8.824	9.6248	0.8008	9.6572	0.8332	0.039	1.6653	1.7328
	200	200	Training	8.699	8.6513	-0.0477	8.6492	-0.0498	0.0434	-0.0993	-0.1039
	201	201	Prediction	8.301	8.5247	0.2237	-	-	0.0443	0.4666	0.4666
	202	202	Training	9	7.9894	-1.0106	7.9625	-1.0375	0.0259	-2.0876	-2.143
	203	203	Training	7.886	8.2278	0.3418	8.2405	0.3545	0.0358	0.7097	0.7361
	204	204	Prediction	8.222	7.131	-1.091	-	-	0.0218	-2.2489	-2.2489
	205	205	Training	8.097	8.9233	0.8263	8.9661	0.8691	0.0493	1.7277	1.8172
	206	206	Training	9	8.2416	-0.7584	8.2168	-0.7832	0.0317	-1.5713	-1.6227
	207	207	Prediction	8.699	8.343	-0.356	-	-	0.0369	-0.7395	-0.7395
	208	208	Training	9	8.5759	-0.4241	8.5553	-0.4447	0.0463	-0.8854	-0.9284
	209	209	Training	7.959	8.5311	0.5721	8.5554	0.5964	0.0407	1.1909	1.2414
	210	210	Training	7.824	8.1986	0.3746	8.2101	0.3861	0.0297	0.7753	0.7991
	211	211	Training	8.523	8.1201	-0.4029	8.1074	-0.4156	0.0305	-0.8343	-0.8605
	212	212	Training	5.9	6.1545	0.2545	6.1571	0.2571	0.01	0.5215	0.5268
	213	213	Training	8.4	7.4508	-0.9492	7.4236	-0.9764	0.0278	-1.9627	-2.0189
	214	214	Training	8.398	7.8677	-0.5303	7.8534	-0.5446	0.0262	-1.0956	-1.1251
	215	215	Training	6.2	6.4682	0.2682	6.4781	0.2781	0.0356	0.5568	0.5774
	216	216	Training	9.538	9.3287	-0.2093	9.3195	-0.2185	0.0418	-0.436	-0.455
	217	217	Training	6.222	6.2151	-0.0069	6.215	-0.007	0.0116	-0.0142	-0.0143
	218	218	Prediction	9.155	9.5698	0.4148	-	-	0.0434	0.8647	0.8647
	219	219	Training	5.1	4.8082	-0.2918	4.8024	-0.2976	0.0194	-0.6007	-0.6126
	220	220	Training	6.2	6.4651	0.2651	6.4691	0.2691	0.0147	0.5445	0.5526
	221	221	Training	5.8	5.2504	-0.5496	5.2372	-0.5628	0.0233	-1.1338	-1.1609
	222	222	Training	5.8	5.9597	0.1597	5.9642	0.1642	0.0271	0.3301	0.3393
	223	223	Training	5.8	5.934	0.134	5.9359	0.1359	0.0142	0.275	0.279
	224	224	Training	5.6	5.8275	0.2275	5.8296	0.2296	0.009	0.4659	0.4701
